# Supplementary material
Source: publisher figshare collection journal article supplement (https://gsajournals.figshare.com/ndownloader/files/28963314)
Supplement: Supplementary file 1 [file 28963314]

p_raw	p_adj	trait2	trait1_diet
0.518511133030183	1	AS_TAUC	AS_SLOP:Diet1D
0.953779608024498	1	AS_TAUC	AS_SLOP:Diet2D
0.988372005586398	1	AS_TAUC	AS_SLOP:Diet20
0.737565842221367	1	AS_TAUC	AS_SLOP:Diet40
0.0708432198368505	1	AS_XINF	AS_SLOP:Diet1D
0.198284782781394	1	AS_XINF	AS_SLOP:Diet2D
0.00444819228478615	1	AS_XINF	AS_SLOP:Diet20
0.66038912677592	1	AS_XINF	AS_SLOP:Diet40
0.764158948862728	1	AS_YINF	AS_SLOP:Diet1D
0.735442560159413	1	AS_YINF	AS_SLOP:Diet2D
0.576929128253195	1	AS_YINF	AS_SLOP:Diet20
0.485651856619613	1	AS_YINF	AS_SLOP:Diet40
0.727529750746359	1	DX_BARE	AS_SLOP:Diet1D
0.932792521362612	1	DX_BARE	AS_SLOP:Diet2D
0.505255040451705	1	DX_BARE	AS_SLOP:Diet20
0.673531427500133	1	DX_BARE	AS_SLOP:Diet40
0.89042830420874	1	DX_BODY	AS_SLOP:Diet1D
0.590673124202466	1	DX_BODY	AS_SLOP:Diet2D
0.617916805885883	1	DX_BODY	AS_SLOP:Diet20
0.0748755331551607	1	DX_BODY	AS_SLOP:Diet40
0.952782001403721	1	DX_BOMC	AS_SLOP:Diet1D
0.860660137141064	1	DX_BOMC	AS_SLOP:Diet2D
0.862863795450005	1	DX_BOMC	AS_SLOP:Diet20
0.968776909179249	1	DX_BOMC	AS_SLOP:Diet40
0.879007820476961	1	DX_BOMD	AS_SLOP:Diet1D
0.857532519209892	1	DX_BOMD	AS_SLOP:Diet2D
0.174682344407242	1	DX_BOMD	AS_SLOP:Diet20
0.851964675220037	1	DX_BOMD	AS_SLOP:Diet40
0.321880014980606	1	DX_PFAT	AS_SLOP:Diet1D
0.725415726446759	1	DX_PFAT	AS_SLOP:Diet2D
0.979924979211348	1	DX_PFAT	AS_SLOP:Diet20
0.0608592747328734	1	DX_PFAT	AS_SLOP:Diet40
0.595114958603217	1	DX_SIZE	AS_SLOP:Diet1D
0.580106988336334	1	DX_SIZE	AS_SLOP:Diet2D
0.179568311391092	1	DX_SIZE	AS_SLOP:Diet20
0.197263978097651	1	DX_SIZE	AS_SLOP:Diet40
0.793758368736945	1	DX_TARE	AS_SLOP:Diet1D
0.880861565832614	1	DX_TARE	AS_SLOP:Diet2D
0.877364111161011	1	DX_TARE	AS_SLOP:Diet20
0.205122177136516	1	DX_TARE	AS_SLOP:Diet40
0.704576397071469	1	DX_TTME	AS_SLOP:Diet1D
0.674788386461452	1	DX_TTME	AS_SLOP:Diet2D
0.746873928086759	1	DX_TTME	AS_SLOP:Diet20
0.0770345350558497	1	DX_TTME	AS_SLOP:Diet40
0.881638494643451	1	EC_COUT	AS_SLOP:Diet1D
0.385011164616732	1	EC_COUT	AS_SLOP:Diet2D
0.779847019495765	1	EC_COUT	AS_SLOP:Diet20
0.967853542380007	1	EC_COUT	AS_SLOP:Diet40
0.0870905675622227	1	EC_EFRA	AS_SLOP:Diet1D
0.00244321775120945	1	EC_EFRA	AS_SLOP:Diet2D
0.714106773937389	1	EC_EFRA	AS_SLOP:Diet20
0.0498621205828659	1	EC_EFRA	AS_SLOP:Diet40
0.402145951647252	1	EC_HRAT	AS_SLOP:Diet1D
0.71237405933084	1	EC_HRAT	AS_SLOP:Diet2D
0.419913209502105	1	EC_HRAT	AS_SLOP:Diet20
0.9820572658637	1	EC_HRAT	AS_SLOP:Diet40
0.828156952697441	1	EC_IVSD	AS_SLOP:Diet1D
0.85728804419494	1	EC_IVSD	AS_SLOP:Diet2D
0.122857560409246	1	EC_IVSD	AS_SLOP:Diet20
0.500002443572687	1	EC_IVSD	AS_SLOP:Diet40
0.835192362879739	1	EC_IVSS	AS_SLOP:Diet1D
0.0597248397353852	1	EC_IVSS	AS_SLOP:Diet2D
0.0206372705652109	1	EC_IVSS	AS_SLOP:Diet20
0.203062601089335	1	EC_IVSS	AS_SLOP:Diet40
0.0448856362156881	1	EC_LVID	AS_SLOP:Diet1D
0.0373278682727014	1	EC_LVID	AS_SLOP:Diet2D
0.68069356043181	1	EC_LVID	AS_SLOP:Diet20
0.0770846092779686	1	EC_LVID	AS_SLOP:Diet40
0.0292718376152456	1	EC_LVIS	AS_SLOP:Diet1D
0.00169887488599635	1	EC_LVIS	AS_SLOP:Diet2D
0.583930134587667	1	EC_LVIS	AS_SLOP:Diet20
0.0256041427376196	1	EC_LVIS	AS_SLOP:Diet40
0.629790738514869	1	EC_LVMA	AS_SLOP:Diet1D
0.168267765324804	1	EC_LVMA	AS_SLOP:Diet2D
0.4949704450495	1	EC_LVMA	AS_SLOP:Diet20
0.789679148721524	1	EC_LVMA	AS_SLOP:Diet40
0.0406704809940814	1	EC_LVPD	AS_SLOP:Diet1D
0.59937305929916	1	EC_LVPD	AS_SLOP:Diet2D
0.58669246187506	1	EC_LVPD	AS_SLOP:Diet20
0.142440148903257	1	EC_LVPD	AS_SLOP:Diet40
0.0193456139375141	1	EC_LVPS	AS_SLOP:Diet1D
0.0571260026327539	1	EC_LVPS	AS_SLOP:Diet2D
0.854554490327955	1	EC_LVPS	AS_SLOP:Diet20
0.0114490651725924	1	EC_LVPS	AS_SLOP:Diet40
0.749086410439542	1	EC_STRO	AS_SLOP:Diet1D
0.543865775947759	1	EC_STRO	AS_SLOP:Diet2D
0.963356735394039	1	EC_STRO	AS_SLOP:Diet20
0.851268997607056	1	EC_STRO	AS_SLOP:Diet40
0.453317177220416	1	GS_APAW	AS_SLOP:Diet1D
0.273494979318301	1	GS_APAW	AS_SLOP:Diet2D
0.614819125546656	1	GS_APAW	AS_SLOP:Diet20
0.2133593560748	1	GS_APAW	AS_SLOP:Diet40
0.402694914137665	1	GS_FORE	AS_SLOP:Diet1D
0.74486565945164	1	GS_FORE	AS_SLOP:Diet2D
0.511825542849837	1	GS_FORE	AS_SLOP:Diet20
0.708018837696695	1	GS_FORE	AS_SLOP:Diet40
0.545904258936619	1	RR_FIRS	AS_SLOP:Diet1D
0.209476113534741	1	RR_FIRS	AS_SLOP:Diet2D
0.438596279424933	1	RR_FIRS	AS_SLOP:Diet20
0.599012161425605	1	RR_FIRS	AS_SLOP:Diet40
0.784186850544397	1	RR_SLOP	AS_SLOP:Diet1D
0.461222080816766	1	RR_SLOP	AS_SLOP:Diet2D
0.714069552979392	1	RR_SLOP	AS_SLOP:Diet20
0.486629568869665	1	RR_SLOP	AS_SLOP:Diet40
0.284299496469251	1	RR_TAVG	AS_SLOP:Diet1D
0.757099132406076	1	RR_TAVG	AS_SLOP:Diet2D
0.15004707294295	1	RR_TAVG	AS_SLOP:Diet20
0.631446958075581	1	RR_TAVG	AS_SLOP:Diet40
0.628474610573275	1	WR_DDAY	AS_SLOP:Diet1D
0.980796200070845	1	WR_DDAY	AS_SLOP:Diet2D
0.74713476087711	1	WR_DDAY	AS_SLOP:Diet20
0.546625818854594	1	WR_DDAY	AS_SLOP:Diet40
0.659797702167434	1	WR_DIST	AS_SLOP:Diet1D
0.628723196488127	1	WR_DIST	AS_SLOP:Diet2D
0.591392993294265	1	WR_DIST	AS_SLOP:Diet20
0.155745465501838	1	WR_DIST	AS_SLOP:Diet40
0.746727098016994	1	WR_DNIG	AS_SLOP:Diet1D
0.643684337818744	1	WR_DNIG	AS_SLOP:Diet2D
0.523124222635382	1	WR_DNIG	AS_SLOP:Diet20
0.132814126171183	1	WR_DNIG	AS_SLOP:Diet40
0.859541255269995	1	WR_MDAY	AS_SLOP:Diet1D
0.660220125503719	1	WR_MDAY	AS_SLOP:Diet2D
0.98374561726856	1	WR_MDAY	AS_SLOP:Diet20
0.320095752615315	1	WR_MDAY	AS_SLOP:Diet40
0.375582934130544	1	WR_MNIG	AS_SLOP:Diet1D
0.533686000354147	1	WR_MNIG	AS_SLOP:Diet2D
0.98367289901364	1	WR_MNIG	AS_SLOP:Diet20
0.483589804827131	1	WR_MNIG	AS_SLOP:Diet40
0.265080804861945	1	WR_MSPE	AS_SLOP:Diet1D
0.292432916512025	1	WR_MSPE	AS_SLOP:Diet2D
0.511292947936947	1	WR_MSPE	AS_SLOP:Diet20
0.557326708954914	1	WR_MSPE	AS_SLOP:Diet40
0.817695071819773	1	WR_TDAY	AS_SLOP:Diet1D
0.739998436080628	1	WR_TDAY	AS_SLOP:Diet2D
0.679600391524339	1	WR_TDAY	AS_SLOP:Diet20
0.749008896997869	1	WR_TDAY	AS_SLOP:Diet40
0.644903567375329	1	WR_TNIG	AS_SLOP:Diet1D
0.814672373537978	1	WR_TNIG	AS_SLOP:Diet2D
0.5280406808662	1	WR_TNIG	AS_SLOP:Diet20
0.222586953055873	1	WR_TNIG	AS_SLOP:Diet40
0.466209392857941	1	AS_SLOP	AS_TAUC:Diet1D
0.778641059412878	1	AS_SLOP	AS_TAUC:Diet2D
0.948742131829525	1	AS_SLOP	AS_TAUC:Diet20
0.669924725938077	1	AS_SLOP	AS_TAUC:Diet40
0.109952940638436	1	AS_XINF	AS_TAUC:Diet1D
0.190730184032321	1	AS_XINF	AS_TAUC:Diet2D
0.861136469034434	1	AS_XINF	AS_TAUC:Diet20
0.384320523480908	1	AS_XINF	AS_TAUC:Diet40
0.607036319193744	1	AS_YINF	AS_TAUC:Diet1D
0.380942928339498	1	AS_YINF	AS_TAUC:Diet2D
0.495487501739191	1	AS_YINF	AS_TAUC:Diet20
0.85924891715851	1	AS_YINF	AS_TAUC:Diet40
0.556290009731204	1	DX_BARE	AS_TAUC:Diet1D
0.643565489023084	1	DX_BARE	AS_TAUC:Diet2D
0.440418766151003	1	DX_BARE	AS_TAUC:Diet20
0.450598022738313	1	DX_BARE	AS_TAUC:Diet40
0.280755041100339	1	DX_BODY	AS_TAUC:Diet1D
0.369979643214823	1	DX_BODY	AS_TAUC:Diet2D
0.744422056938201	1	DX_BODY	AS_TAUC:Diet20
0.319337883255378	1	DX_BODY	AS_TAUC:Diet40
0.577137128993652	1	DX_BOMC	AS_TAUC:Diet1D
0.985880299791722	1	DX_BOMC	AS_TAUC:Diet2D
0.264713741324822	1	DX_BOMC	AS_TAUC:Diet20
0.375693774726214	1	DX_BOMC	AS_TAUC:Diet40
0.97181982010341	1	DX_BOMD	AS_TAUC:Diet1D
0.364952215281059	1	DX_BOMD	AS_TAUC:Diet2D
0.332003954039153	1	DX_BOMD	AS_TAUC:Diet20
0.627627292797282	1	DX_BOMD	AS_TAUC:Diet40
0.946072672757519	1	DX_PFAT	AS_TAUC:Diet1D
0.589341682087142	1	DX_PFAT	AS_TAUC:Diet2D
0.316367236667476	1	DX_PFAT	AS_TAUC:Diet20
0.763639962739239	1	DX_PFAT	AS_TAUC:Diet40
0.556802119790662	1	DX_SIZE	AS_TAUC:Diet1D
0.313298904292612	1	DX_SIZE	AS_TAUC:Diet2D
0.479538914334114	1	DX_SIZE	AS_TAUC:Diet20
0.202585739741959	1	DX_SIZE	AS_TAUC:Diet40
0.512087592017741	1	DX_TARE	AS_TAUC:Diet1D
0.406830213542414	1	DX_TARE	AS_TAUC:Diet2D
0.468294660978455	1	DX_TARE	AS_TAUC:Diet20
0.570744142026623	1	DX_TARE	AS_TAUC:Diet40
0.379335334735413	1	DX_TTME	AS_TAUC:Diet1D
0.268276945685676	1	DX_TTME	AS_TAUC:Diet2D
0.60619952614123	1	DX_TTME	AS_TAUC:Diet20
0.29540485400848	1	DX_TTME	AS_TAUC:Diet40
0.0857323381786064	1	EC_COUT	AS_TAUC:Diet1D
0.522705235773173	1	EC_COUT	AS_TAUC:Diet2D
0.516544406102617	1	EC_COUT	AS_TAUC:Diet20
0.186604772550639	1	EC_COUT	AS_TAUC:Diet40
0.685963653812389	1	EC_EFRA	AS_TAUC:Diet1D
0.978625296977789	1	EC_EFRA	AS_TAUC:Diet2D
0.637963694775565	1	EC_EFRA	AS_TAUC:Diet20
0.884372413795203	1	EC_EFRA	AS_TAUC:Diet40
0.680821814789216	1	EC_HRAT	AS_TAUC:Diet1D
0.451999868008511	1	EC_HRAT	AS_TAUC:Diet2D
0.388778901342395	1	EC_HRAT	AS_TAUC:Diet20
0.846957786182118	1	EC_HRAT	AS_TAUC:Diet40
0.536331950505807	1	EC_IVSD	AS_TAUC:Diet1D
0.354385187511281	1	EC_IVSD	AS_TAUC:Diet2D
0.553001113105164	1	EC_IVSD	AS_TAUC:Diet20
0.960208616652478	1	EC_IVSD	AS_TAUC:Diet40
0.339971109425316	1	EC_IVSS	AS_TAUC:Diet1D
0.315445915066609	1	EC_IVSS	AS_TAUC:Diet2D
0.66506513145309	1	EC_IVSS	AS_TAUC:Diet20
0.901615002085218	1	EC_IVSS	AS_TAUC:Diet40
0.241205486991816	1	EC_LVID	AS_TAUC:Diet1D
0.723630044019138	1	EC_LVID	AS_TAUC:Diet2D
0.728292226754988	1	EC_LVID	AS_TAUC:Diet20
0.244504285342002	1	EC_LVID	AS_TAUC:Diet40
0.720483253976586	1	EC_LVIS	AS_TAUC:Diet1D
0.826955290076774	1	EC_LVIS	AS_TAUC:Diet2D
0.971191429982277	1	EC_LVIS	AS_TAUC:Diet20
0.496837449671381	1	EC_LVIS	AS_TAUC:Diet40
0.0969795307568433	1	EC_LVMA	AS_TAUC:Diet1D
0.579361201758681	1	EC_LVMA	AS_TAUC:Diet2D
0.740039548420798	1	EC_LVMA	AS_TAUC:Diet20
0.272818029881919	1	EC_LVMA	AS_TAUC:Diet40
0.430637200335977	1	EC_LVPD	AS_TAUC:Diet1D
0.0997278284166005	1	EC_LVPD	AS_TAUC:Diet2D
0.342337128667763	1	EC_LVPD	AS_TAUC:Diet20
0.71864233206493	1	EC_LVPD	AS_TAUC:Diet40
0.104246201244897	1	EC_LVPS	AS_TAUC:Diet1D
0.297140098107575	1	EC_LVPS	AS_TAUC:Diet2D
0.515540603496502	1	EC_LVPS	AS_TAUC:Diet20
0.269364932509911	1	EC_LVPS	AS_TAUC:Diet40
0.103312088456852	1	EC_STRO	AS_TAUC:Diet1D
0.787823890004636	1	EC_STRO	AS_TAUC:Diet2D
0.359794522763385	1	EC_STRO	AS_TAUC:Diet20
0.179678750967989	1	EC_STRO	AS_TAUC:Diet40
0.120706829440378	1	GS_APAW	AS_TAUC:Diet1D
0.159146649579979	1	GS_APAW	AS_TAUC:Diet2D
0.0622976338413983	1	GS_APAW	AS_TAUC:Diet20
0.00864796409752018	1	GS_APAW	AS_TAUC:Diet40
0.113024047631942	1	GS_FORE	AS_TAUC:Diet1D
0.852208675505976	1	GS_FORE	AS_TAUC:Diet2D
0.987800189285385	1	GS_FORE	AS_TAUC:Diet20
0.486351149240672	1	GS_FORE	AS_TAUC:Diet40
0.171913856341632	1	RR_FIRS	AS_TAUC:Diet1D
0.856229852507554	1	RR_FIRS	AS_TAUC:Diet2D
0.98718237908563	1	RR_FIRS	AS_TAUC:Diet20
0.43379743897601	1	RR_FIRS	AS_TAUC:Diet40
0.352695546824208	1	RR_SLOP	AS_TAUC:Diet1D
0.518285532649614	1	RR_SLOP	AS_TAUC:Diet2D
0.592147365910223	1	RR_SLOP	AS_TAUC:Diet20
0.562960747543782	1	RR_SLOP	AS_TAUC:Diet40
0.700911782593402	1	RR_TAVG	AS_TAUC:Diet1D
0.818483295054541	1	RR_TAVG	AS_TAUC:Diet2D
0.693083200294864	1	RR_TAVG	AS_TAUC:Diet20
0.769391206841745	1	RR_TAVG	AS_TAUC:Diet40
0.936359322552739	1	WR_DDAY	AS_TAUC:Diet1D
0.543925419013575	1	WR_DDAY	AS_TAUC:Diet2D
0.767000404754016	1	WR_DDAY	AS_TAUC:Diet20
0.387634736582755	1	WR_DDAY	AS_TAUC:Diet40
0.523236806122419	1	WR_DIST	AS_TAUC:Diet1D
0.863979091548735	1	WR_DIST	AS_TAUC:Diet2D
0.473898808017197	1	WR_DIST	AS_TAUC:Diet20
0.272392736208216	1	WR_DIST	AS_TAUC:Diet40
0.528113021749831	1	WR_DNIG	AS_TAUC:Diet1D
0.863147702930144	1	WR_DNIG	AS_TAUC:Diet2D
0.494215425354709	1	WR_DNIG	AS_TAUC:Diet20
0.323525758518785	1	WR_DNIG	AS_TAUC:Diet40
0.981672963975578	1	WR_MDAY	AS_TAUC:Diet1D
0.325508298836868	1	WR_MDAY	AS_TAUC:Diet2D
0.476632453651573	1	WR_MDAY	AS_TAUC:Diet20
0.274956124238906	1	WR_MDAY	AS_TAUC:Diet40
0.443717690240506	1	WR_MNIG	AS_TAUC:Diet1D
0.864148996684035	1	WR_MNIG	AS_TAUC:Diet2D
0.455927064198549	1	WR_MNIG	AS_TAUC:Diet20
0.144271129560124	1	WR_MNIG	AS_TAUC:Diet40
0.291833296382743	1	WR_MSPE	AS_TAUC:Diet1D
0.476045012522958	1	WR_MSPE	AS_TAUC:Diet2D
0.800160724326438	1	WR_MSPE	AS_TAUC:Diet20
0.0799137846528346	1	WR_MSPE	AS_TAUC:Diet40
0.864528353777176	1	WR_TDAY	AS_TAUC:Diet1D
0.994601029142016	1	WR_TDAY	AS_TAUC:Diet2D
0.455001764299286	1	WR_TDAY	AS_TAUC:Diet20
0.899220441194926	1	WR_TDAY	AS_TAUC:Diet40
0.427555318677962	1	WR_TNIG	AS_TAUC:Diet1D
0.971335770157012	1	WR_TNIG	AS_TAUC:Diet2D
0.628229776787422	1	WR_TNIG	AS_TAUC:Diet20
0.303794566384836	1	WR_TNIG	AS_TAUC:Diet40
0.0378549315214355	1	AS_SLOP	AS_XINF:Diet1D
0.150893127704293	1	AS_SLOP	AS_XINF:Diet2D
0.00192517543520255	1	AS_SLOP	AS_XINF:Diet20
0.307179355966197	1	AS_SLOP	AS_XINF:Diet40
0.626389978789444	1	AS_TAUC	AS_XINF:Diet1D
0.398309222772182	1	AS_TAUC	AS_XINF:Diet2D
0.771705797796202	1	AS_TAUC	AS_XINF:Diet20
0.943441963522989	1	AS_TAUC	AS_XINF:Diet40
0.213441290178973	1	AS_YINF	AS_XINF:Diet1D
0.638950642209928	1	AS_YINF	AS_XINF:Diet2D
0.922696584327308	1	AS_YINF	AS_XINF:Diet20
0.918197835105682	1	AS_YINF	AS_XINF:Diet40
0.813426473127942	1	DX_BARE	AS_XINF:Diet1D
0.76571178864365	1	DX_BARE	AS_XINF:Diet2D
0.291815552111949	1	DX_BARE	AS_XINF:Diet20
0.0934623813790809	1	DX_BARE	AS_XINF:Diet40
0.942448991851206	1	DX_BODY	AS_XINF:Diet1D
0.436564637475775	1	DX_BODY	AS_XINF:Diet2D
0.510664925147865	1	DX_BODY	AS_XINF:Diet20
0.692344352541219	1	DX_BODY	AS_XINF:Diet40
0.51993156162585	1	DX_BOMC	AS_XINF:Diet1D
0.835052162579802	1	DX_BOMC	AS_XINF:Diet2D
0.258965175755434	1	DX_BOMC	AS_XINF:Diet20
0.113183536491973	1	DX_BOMC	AS_XINF:Diet40
0.314171383925175	1	DX_BOMD	AS_XINF:Diet1D
0.926694199432155	1	DX_BOMD	AS_XINF:Diet2D
0.513952580825856	1	DX_BOMD	AS_XINF:Diet20
0.386299884934912	1	DX_BOMD	AS_XINF:Diet40
0.482972502936743	1	DX_PFAT	AS_XINF:Diet1D
0.784630568088007	1	DX_PFAT	AS_XINF:Diet2D
0.188447674303671	1	DX_PFAT	AS_XINF:Diet20
0.377613209228064	1	DX_PFAT	AS_XINF:Diet40
0.627472064189931	1	DX_SIZE	AS_XINF:Diet1D
0.268357043982811	1	DX_SIZE	AS_XINF:Diet2D
0.125533716334786	1	DX_SIZE	AS_XINF:Diet20
0.491811975454547	1	DX_SIZE	AS_XINF:Diet40
0.843278986764034	1	DX_TARE	AS_XINF:Diet1D
0.340777514363753	1	DX_TARE	AS_XINF:Diet2D
0.577113398892623	1	DX_TARE	AS_XINF:Diet20
0.80999896945265	1	DX_TARE	AS_XINF:Diet40
0.954946343171442	1	DX_TTME	AS_XINF:Diet1D
0.375945434000572	1	DX_TTME	AS_XINF:Diet2D
0.606675706732442	1	DX_TTME	AS_XINF:Diet20
0.726036084614849	1	DX_TTME	AS_XINF:Diet40
0.464805506324323	1	EC_COUT	AS_XINF:Diet1D
0.21459405389391	1	EC_COUT	AS_XINF:Diet2D
0.507095949391663	1	EC_COUT	AS_XINF:Diet20
0.409507687048785	1	EC_COUT	AS_XINF:Diet40
0.37856197029222	1	EC_EFRA	AS_XINF:Diet1D
0.371165828559394	1	EC_EFRA	AS_XINF:Diet2D
0.731194280447728	1	EC_EFRA	AS_XINF:Diet20
0.518325214466191	1	EC_EFRA	AS_XINF:Diet40
0.513930962506533	1	EC_HRAT	AS_XINF:Diet1D
0.782651959620421	1	EC_HRAT	AS_XINF:Diet2D
0.474335326745196	1	EC_HRAT	AS_XINF:Diet20
0.00676299601771262	1	EC_HRAT	AS_XINF:Diet40
0.996136232023104	1	EC_IVSD	AS_XINF:Diet1D
0.858142449549043	1	EC_IVSD	AS_XINF:Diet2D
0.850423401550971	1	EC_IVSD	AS_XINF:Diet20
0.843655768398304	1	EC_IVSD	AS_XINF:Diet40
0.238137943377855	1	EC_IVSS	AS_XINF:Diet1D
0.39481958904921	1	EC_IVSS	AS_XINF:Diet2D
0.459757637630842	1	EC_IVSS	AS_XINF:Diet20
0.708035163809936	1	EC_IVSS	AS_XINF:Diet40
0.918989253478813	1	EC_LVID	AS_XINF:Diet1D
0.469804403944246	1	EC_LVID	AS_XINF:Diet2D
0.498830504925501	1	EC_LVID	AS_XINF:Diet20
0.373492393923581	1	EC_LVID	AS_XINF:Diet40
0.59167288798267	1	EC_LVIS	AS_XINF:Diet1D
0.854035829486199	1	EC_LVIS	AS_XINF:Diet2D
0.907893272278895	1	EC_LVIS	AS_XINF:Diet20
0.906615494704746	1	EC_LVIS	AS_XINF:Diet40
0.690886270887967	1	EC_LVMA	AS_XINF:Diet1D
0.577029606132585	1	EC_LVMA	AS_XINF:Diet2D
0.400672829685717	1	EC_LVMA	AS_XINF:Diet20
0.479693200379329	1	EC_LVMA	AS_XINF:Diet40
0.35112539282366	1	EC_LVPD	AS_XINF:Diet1D
0.539830562426611	1	EC_LVPD	AS_XINF:Diet2D
0.528165891865193	1	EC_LVPD	AS_XINF:Diet20
0.798116249777551	1	EC_LVPD	AS_XINF:Diet40
0.176599051566909	1	EC_LVPS	AS_XINF:Diet1D
0.412378036927688	1	EC_LVPS	AS_XINF:Diet2D
0.592532618494065	1	EC_LVPS	AS_XINF:Diet20
0.752906838416852	1	EC_LVPS	AS_XINF:Diet40
0.234481079325264	1	EC_STRO	AS_XINF:Diet1D
0.129168008674829	1	EC_STRO	AS_XINF:Diet2D
0.319961723110657	1	EC_STRO	AS_XINF:Diet20
0.0587754312266568	1	EC_STRO	AS_XINF:Diet40
0.115570904469179	1	GS_APAW	AS_XINF:Diet1D
0.109631522036218	1	GS_APAW	AS_XINF:Diet2D
0.515185251690322	1	GS_APAW	AS_XINF:Diet20
0.0757853553739594	1	GS_APAW	AS_XINF:Diet40
0.389319137032093	1	GS_FORE	AS_XINF:Diet1D
0.575058396351874	1	GS_FORE	AS_XINF:Diet2D
0.863924640762871	1	GS_FORE	AS_XINF:Diet20
0.484994995324869	1	GS_FORE	AS_XINF:Diet40
0.854105487833836	1	RR_FIRS	AS_XINF:Diet1D
0.872945313491842	1	RR_FIRS	AS_XINF:Diet2D
0.0826775819374266	1	RR_FIRS	AS_XINF:Diet20
0.931545631604475	1	RR_FIRS	AS_XINF:Diet40
0.619459539133573	1	RR_SLOP	AS_XINF:Diet1D
0.648834701549706	1	RR_SLOP	AS_XINF:Diet2D
0.143023536062326	1	RR_SLOP	AS_XINF:Diet20
0.576028531777805	1	RR_SLOP	AS_XINF:Diet40
0.923670988399206	1	RR_TAVG	AS_XINF:Diet1D
0.714164748512683	1	RR_TAVG	AS_XINF:Diet2D
0.819377854742475	1	RR_TAVG	AS_XINF:Diet20
0.396814762871428	1	RR_TAVG	AS_XINF:Diet40
0.422742963373092	1	WR_DDAY	AS_XINF:Diet1D
0.563658085090899	1	WR_DDAY	AS_XINF:Diet2D
0.805451642026937	1	WR_DDAY	AS_XINF:Diet20
0.526305550174269	1	WR_DDAY	AS_XINF:Diet40
0.299427449428483	1	WR_DIST	AS_XINF:Diet1D
0.162572702266636	1	WR_DIST	AS_XINF:Diet2D
0.850884364411445	1	WR_DIST	AS_XINF:Diet20
0.683481212437633	1	WR_DIST	AS_XINF:Diet40
0.361890566257852	1	WR_DNIG	AS_XINF:Diet1D
0.167663303461001	1	WR_DNIG	AS_XINF:Diet2D
0.868921180015273	1	WR_DNIG	AS_XINF:Diet20
0.693580566471983	1	WR_DNIG	AS_XINF:Diet40
0.383143359443411	1	WR_MDAY	AS_XINF:Diet1D
0.146569924253866	1	WR_MDAY	AS_XINF:Diet2D
0.446658864739807	1	WR_MDAY	AS_XINF:Diet20
0.505312367230099	1	WR_MDAY	AS_XINF:Diet40
0.814404878691561	1	WR_MNIG	AS_XINF:Diet1D
0.411157149400526	1	WR_MNIG	AS_XINF:Diet2D
0.976800952474886	1	WR_MNIG	AS_XINF:Diet20
0.338940586725038	1	WR_MNIG	AS_XINF:Diet40
0.472044732805428	1	WR_MSPE	AS_XINF:Diet1D
0.544208331920003	1	WR_MSPE	AS_XINF:Diet2D
0.816084949751203	1	WR_MSPE	AS_XINF:Diet20
0.212424677608086	1	WR_MSPE	AS_XINF:Diet40
0.345789770711484	1	WR_TDAY	AS_XINF:Diet1D
0.470281269698315	1	WR_TDAY	AS_XINF:Diet2D
0.872501106164098	1	WR_TDAY	AS_XINF:Diet20
0.936270075196062	1	WR_TDAY	AS_XINF:Diet40
0.256367745885657	1	WR_TNIG	AS_XINF:Diet1D
0.198208482465945	1	WR_TNIG	AS_XINF:Diet2D
0.736265328938919	1	WR_TNIG	AS_XINF:Diet20
0.938432456251705	1	WR_TNIG	AS_XINF:Diet40
0.749790138549299	1	AS_SLOP	AS_YINF:Diet1D
0.650473943187984	1	AS_SLOP	AS_YINF:Diet2D
0.472059761942267	1	AS_SLOP	AS_YINF:Diet20
0.505395423592547	1	AS_SLOP	AS_YINF:Diet40
0.767002452824635	1	AS_TAUC	AS_YINF:Diet1D
0.208275454073718	1	AS_TAUC	AS_YINF:Diet2D
0.819814884909826	1	AS_TAUC	AS_YINF:Diet20
0.142602847513098	1	AS_TAUC	AS_YINF:Diet40
0.345834819983857	1	AS_XINF	AS_YINF:Diet1D
0.767490866326031	1	AS_XINF	AS_YINF:Diet2D
0.79283769490583	1	AS_XINF	AS_YINF:Diet20
0.699347078257449	1	AS_XINF	AS_YINF:Diet40
0.3732619150319	1	DX_BARE	AS_YINF:Diet1D
0.916346270619364	1	DX_BARE	AS_YINF:Diet2D
0.153748875894845	1	DX_BARE	AS_YINF:Diet20
0.950606407622781	1	DX_BARE	AS_YINF:Diet40
0.156885802000375	1	DX_BODY	AS_YINF:Diet1D
0.520498774901917	1	DX_BODY	AS_YINF:Diet2D
0.178122393206488	1	DX_BODY	AS_YINF:Diet20
0.436411800219099	1	DX_BODY	AS_YINF:Diet40
0.529408286736685	1	DX_BOMC	AS_YINF:Diet1D
0.734732815244109	1	DX_BOMC	AS_YINF:Diet2D
0.0433512817275336	1	DX_BOMC	AS_YINF:Diet20
0.916079855040302	1	DX_BOMC	AS_YINF:Diet40
0.7426375336097	1	DX_BOMD	AS_YINF:Diet1D
0.352389793744791	1	DX_BOMD	AS_YINF:Diet2D
0.0880039395269452	1	DX_BOMD	AS_YINF:Diet20
0.915358911604655	1	DX_BOMD	AS_YINF:Diet40
0.689672119200055	1	DX_PFAT	AS_YINF:Diet1D
0.736551205522475	1	DX_PFAT	AS_YINF:Diet2D
0.550572528030273	1	DX_PFAT	AS_YINF:Diet20
0.696068815340036	1	DX_PFAT	AS_YINF:Diet40
0.28914439865149	1	DX_SIZE	AS_YINF:Diet1D
0.740107220600787	1	DX_SIZE	AS_YINF:Diet2D
0.374140928144248	1	DX_SIZE	AS_YINF:Diet20
0.216180409204254	1	DX_SIZE	AS_YINF:Diet40
0.265796164230337	1	DX_TARE	AS_YINF:Diet1D
0.648271473803767	1	DX_TARE	AS_YINF:Diet2D
0.14184757556422	1	DX_TARE	AS_YINF:Diet20
0.729837863954038	1	DX_TARE	AS_YINF:Diet40
0.196609310881202	1	DX_TTME	AS_YINF:Diet1D
0.443298963507468	1	DX_TTME	AS_YINF:Diet2D
0.140918782759269	1	DX_TTME	AS_YINF:Diet20
0.361805879026854	1	DX_TTME	AS_YINF:Diet40
0.0971720789856037	1	EC_COUT	AS_YINF:Diet1D
0.855019570411245	1	EC_COUT	AS_YINF:Diet2D
0.698803024695067	1	EC_COUT	AS_YINF:Diet20
0.341156036350857	1	EC_COUT	AS_YINF:Diet40
0.70014760021074	1	EC_EFRA	AS_YINF:Diet1D
0.633219102335342	1	EC_EFRA	AS_YINF:Diet2D
0.742389733689687	1	EC_EFRA	AS_YINF:Diet20
0.83042662564172	1	EC_EFRA	AS_YINF:Diet40
0.388660018836633	1	EC_HRAT	AS_YINF:Diet1D
0.51900756375263	1	EC_HRAT	AS_YINF:Diet2D
0.67293545617281	1	EC_HRAT	AS_YINF:Diet20
0.132801970998052	1	EC_HRAT	AS_YINF:Diet40
0.393196110438361	1	EC_IVSD	AS_YINF:Diet1D
0.501356336265509	1	EC_IVSD	AS_YINF:Diet2D
0.755381812319406	1	EC_IVSD	AS_YINF:Diet20
0.877689659122413	1	EC_IVSD	AS_YINF:Diet40
0.513845855635414	1	EC_IVSS	AS_YINF:Diet1D
0.174499579539533	1	EC_IVSS	AS_YINF:Diet2D
0.513258494003434	1	EC_IVSS	AS_YINF:Diet20
0.738517539414731	1	EC_IVSS	AS_YINF:Diet40
0.0735368141282273	1	EC_LVID	AS_YINF:Diet1D
0.938661090353425	1	EC_LVID	AS_YINF:Diet2D
0.910490086343209	1	EC_LVID	AS_YINF:Diet20
0.343808891702902	1	EC_LVID	AS_YINF:Diet40
0.218525517482858	1	EC_LVIS	AS_YINF:Diet1D
0.804562673677517	1	EC_LVIS	AS_YINF:Diet2D
0.917304058112902	1	EC_LVIS	AS_YINF:Diet20
0.43657987075122	1	EC_LVIS	AS_YINF:Diet40
0.076597375173757	1	EC_LVMA	AS_YINF:Diet1D
0.622236056058002	1	EC_LVMA	AS_YINF:Diet2D
0.819397822633854	1	EC_LVMA	AS_YINF:Diet20
0.203647442835319	1	EC_LVMA	AS_YINF:Diet40
0.638835411868191	1	EC_LVPD	AS_YINF:Diet1D
0.0834173121170277	1	EC_LVPD	AS_YINF:Diet2D
0.509795766668208	1	EC_LVPD	AS_YINF:Diet20
0.395178996940406	1	EC_LVPD	AS_YINF:Diet40
0.634218685002172	1	EC_LVPS	AS_YINF:Diet1D
0.221609797713162	1	EC_LVPS	AS_YINF:Diet2D
0.465404235658588	1	EC_LVPS	AS_YINF:Diet20
0.131065568730692	1	EC_LVPS	AS_YINF:Diet40
0.198299424999231	1	EC_STRO	AS_YINF:Diet1D
0.571003168023585	1	EC_STRO	AS_YINF:Diet2D
0.691292110706255	1	EC_STRO	AS_YINF:Diet20
0.637163891807159	1	EC_STRO	AS_YINF:Diet40
0.161652447567045	1	GS_APAW	AS_YINF:Diet1D
0.435026385183228	1	GS_APAW	AS_YINF:Diet2D
0.0162597757469889	1	GS_APAW	AS_YINF:Diet20
0.0423305550897839	1	GS_APAW	AS_YINF:Diet40
0.140315697479584	1	GS_FORE	AS_YINF:Diet1D
0.442716711529042	1	GS_FORE	AS_YINF:Diet2D
0.999708301105331	1	GS_FORE	AS_YINF:Diet20
0.693509583857371	1	GS_FORE	AS_YINF:Diet40
0.182427134109722	1	RR_FIRS	AS_YINF:Diet1D
0.992622877874979	1	RR_FIRS	AS_YINF:Diet2D
0.522365092372242	1	RR_FIRS	AS_YINF:Diet20
0.638412866068469	1	RR_FIRS	AS_YINF:Diet40
0.143819363175935	1	RR_SLOP	AS_YINF:Diet1D
0.993685069717887	1	RR_SLOP	AS_YINF:Diet2D
0.986771868470281	1	RR_SLOP	AS_YINF:Diet20
0.299582380556755	1	RR_SLOP	AS_YINF:Diet40
0.809203617272696	1	RR_TAVG	AS_YINF:Diet1D
0.789757522334239	1	RR_TAVG	AS_YINF:Diet2D
0.648290277693243	1	RR_TAVG	AS_YINF:Diet20
0.622605613847403	1	RR_TAVG	AS_YINF:Diet40
0.65732563879223	1	WR_DDAY	AS_YINF:Diet1D
0.832910284045686	1	WR_DDAY	AS_YINF:Diet2D
0.566040569866143	1	WR_DDAY	AS_YINF:Diet20
0.575871850654597	1	WR_DDAY	AS_YINF:Diet40
0.440109832723228	1	WR_DIST	AS_YINF:Diet1D
0.890662536965545	1	WR_DIST	AS_YINF:Diet2D
0.298330780427624	1	WR_DIST	AS_YINF:Diet20
0.28404897367799	1	WR_DIST	AS_YINF:Diet40
0.39829455792337	1	WR_DNIG	AS_YINF:Diet1D
0.907401983171563	1	WR_DNIG	AS_YINF:Diet2D
0.32156527296183	1	WR_DNIG	AS_YINF:Diet20
0.318972207833956	1	WR_DNIG	AS_YINF:Diet40
0.733312006466922	1	WR_MDAY	AS_YINF:Diet1D
0.873380349860582	1	WR_MDAY	AS_YINF:Diet2D
0.214175758266387	1	WR_MDAY	AS_YINF:Diet20
0.244454422408553	1	WR_MDAY	AS_YINF:Diet40
0.181442402859466	1	WR_MNIG	AS_YINF:Diet1D
0.84708853776121	1	WR_MNIG	AS_YINF:Diet2D
0.255781698023851	1	WR_MNIG	AS_YINF:Diet20
0.319662672202822	1	WR_MNIG	AS_YINF:Diet40
0.027718451375973	1	WR_MSPE	AS_YINF:Diet1D
0.556326044171963	1	WR_MSPE	AS_YINF:Diet2D
0.430908266717532	1	WR_MSPE	AS_YINF:Diet20
0.312285235769156	1	WR_MSPE	AS_YINF:Diet40
0.802397022943574	1	WR_TDAY	AS_YINF:Diet1D
0.510370518529269	1	WR_TDAY	AS_YINF:Diet2D
0.458601736966714	1	WR_TDAY	AS_YINF:Diet20
0.892043935188303	1	WR_TDAY	AS_YINF:Diet40
0.305666970866019	1	WR_TNIG	AS_YINF:Diet1D
0.837784590005177	1	WR_TNIG	AS_YINF:Diet2D
0.514152416983657	1	WR_TNIG	AS_YINF:Diet20
0.406652756795636	1	WR_TNIG	AS_YINF:Diet40
0.832589176109232	1	AS_SLOP	DX_BARE:Diet1D
0.981691839181697	1	AS_SLOP	DX_BARE:Diet2D
0.638833357369712	1	AS_SLOP	DX_BARE:Diet20
0.728746130472781	1	AS_SLOP	DX_BARE:Diet40
0.212752842808642	1	AS_TAUC	DX_BARE:Diet1D
0.158724190774764	1	AS_TAUC	DX_BARE:Diet2D
0.639036275431829	1	AS_TAUC	DX_BARE:Diet20
0.22643335252216	1	AS_TAUC	DX_BARE:Diet40
0.778498578521993	1	AS_XINF	DX_BARE:Diet1D
0.469806285668293	1	AS_XINF	DX_BARE:Diet2D
0.197786447021983	1	AS_XINF	DX_BARE:Diet20
0.0612419178838321	1	AS_XINF	DX_BARE:Diet40
0.165729899786496	1	AS_YINF	DX_BARE:Diet1D
0.395567295818994	1	AS_YINF	DX_BARE:Diet2D
0.913030036436114	1	AS_YINF	DX_BARE:Diet20
0.834356984063393	1	AS_YINF	DX_BARE:Diet40
0.131760658728937	1	DX_BODY	DX_BARE:Diet1D
0.257392684160215	1	DX_BODY	DX_BARE:Diet2D
0.0296280609975617	1	DX_BODY	DX_BARE:Diet20
0.0301385968665038	1	DX_BODY	DX_BARE:Diet40
0.862592129666508	1	DX_BOMC	DX_BARE:Diet1D
0.609288654265817	1	DX_BOMC	DX_BARE:Diet2D
0.778453381578012	1	DX_BOMC	DX_BARE:Diet20
0.158241792356845	1	DX_BOMC	DX_BARE:Diet40
0.942697365900699	1	DX_BOMD	DX_BARE:Diet1D
0.814002109866205	1	DX_BOMD	DX_BARE:Diet2D
0.552447440908012	1	DX_BOMD	DX_BARE:Diet20
0.618529282573503	1	DX_BOMD	DX_BARE:Diet40
0.358845341962279	1	DX_PFAT	DX_BARE:Diet1D
0.754756683064321	1	DX_PFAT	DX_BARE:Diet2D
0.96327589092141	1	DX_PFAT	DX_BARE:Diet20
0.0110719429965287	1	DX_PFAT	DX_BARE:Diet40
0.427625170265016	1	DX_SIZE	DX_BARE:Diet1D
0.295048241619664	1	DX_SIZE	DX_BARE:Diet2D
0.0210621515071671	1	DX_SIZE	DX_BARE:Diet20
0.427135385342053	1	DX_SIZE	DX_BARE:Diet40
0.155180535305619	1	DX_TARE	DX_BARE:Diet1D
0.21135296048733	1	DX_TARE	DX_BARE:Diet2D
0.0368196705652648	1	DX_TARE	DX_BARE:Diet20
0.0439089705781116	1	DX_TARE	DX_BARE:Diet40
0.130401642588021	1	DX_TTME	DX_BARE:Diet1D
0.190284565585366	1	DX_TTME	DX_BARE:Diet2D
0.037634310718825	1	DX_TTME	DX_BARE:Diet20
0.0292356369115282	1	DX_TTME	DX_BARE:Diet40
0.628533733181501	1	EC_COUT	DX_BARE:Diet1D
0.849017674580212	1	EC_COUT	DX_BARE:Diet2D
0.454175562092591	1	EC_COUT	DX_BARE:Diet20
0.367373228718333	1	EC_COUT	DX_BARE:Diet40
0.867060437582211	1	EC_EFRA	DX_BARE:Diet1D
0.192430528451695	1	EC_EFRA	DX_BARE:Diet2D
0.803144391313005	1	EC_EFRA	DX_BARE:Diet20
0.816467348445643	1	EC_EFRA	DX_BARE:Diet40
0.367319182545912	1	EC_HRAT	DX_BARE:Diet1D
0.870606145252898	1	EC_HRAT	DX_BARE:Diet2D
0.619311188525393	1	EC_HRAT	DX_BARE:Diet20
0.0227912852142986	1	EC_HRAT	DX_BARE:Diet40
0.764300076729619	1	EC_IVSD	DX_BARE:Diet1D
0.622520170001927	1	EC_IVSD	DX_BARE:Diet2D
0.0425188747510747	1	EC_IVSD	DX_BARE:Diet20
0.360644483195577	1	EC_IVSD	DX_BARE:Diet40
0.856191876608022	1	EC_IVSS	DX_BARE:Diet1D
0.842999641588728	1	EC_IVSS	DX_BARE:Diet2D
0.367072138526186	1	EC_IVSS	DX_BARE:Diet20
0.997291316679657	1	EC_IVSS	DX_BARE:Diet40
0.971379540132261	1	EC_LVID	DX_BARE:Diet1D
0.456646175810418	1	EC_LVID	DX_BARE:Diet2D
0.62321235947302	1	EC_LVID	DX_BARE:Diet20
0.88856721608294	1	EC_LVID	DX_BARE:Diet40
0.866867789590939	1	EC_LVIS	DX_BARE:Diet1D
0.257637492638701	1	EC_LVIS	DX_BARE:Diet2D
0.791352865013881	1	EC_LVIS	DX_BARE:Diet20
0.783547820509558	1	EC_LVIS	DX_BARE:Diet40
0.705061905583285	1	EC_LVMA	DX_BARE:Diet1D
0.957056967977244	1	EC_LVMA	DX_BARE:Diet2D
0.0230465175857954	1	EC_LVMA	DX_BARE:Diet20
0.354837234638625	1	EC_LVMA	DX_BARE:Diet40
0.809829243498175	1	EC_LVPD	DX_BARE:Diet1D
0.630987571733611	1	EC_LVPD	DX_BARE:Diet2D
0.0726320226043817	1	EC_LVPD	DX_BARE:Diet20
0.584945013438349	1	EC_LVPD	DX_BARE:Diet40
0.966184667159464	1	EC_LVPS	DX_BARE:Diet1D
0.21315970144484	1	EC_LVPS	DX_BARE:Diet2D
0.226746247805906	1	EC_LVPS	DX_BARE:Diet20
0.891432388091743	1	EC_LVPS	DX_BARE:Diet40
0.854835494666884	1	EC_STRO	DX_BARE:Diet1D
0.746977814077383	1	EC_STRO	DX_BARE:Diet2D
0.590509312505074	1	EC_STRO	DX_BARE:Diet20
0.889829614665493	1	EC_STRO	DX_BARE:Diet40
0.276288869027648	1	GS_APAW	DX_BARE:Diet1D
0.0306048687393906	1	GS_APAW	DX_BARE:Diet2D
0.55694936891169	1	GS_APAW	DX_BARE:Diet20
0.166992860299892	1	GS_APAW	DX_BARE:Diet40
0.0752444353212359	1	GS_FORE	DX_BARE:Diet1D
0.784747906087055	1	GS_FORE	DX_BARE:Diet2D
0.850150156107463	1	GS_FORE	DX_BARE:Diet20
0.177762618693652	1	GS_FORE	DX_BARE:Diet40
0.725515744258994	1	RR_FIRS	DX_BARE:Diet1D
0.851272370861751	1	RR_FIRS	DX_BARE:Diet2D
0.585379884230129	1	RR_FIRS	DX_BARE:Diet20
0.673236405318077	1	RR_FIRS	DX_BARE:Diet40
0.352359973223768	1	RR_SLOP	DX_BARE:Diet1D
0.711406854288402	1	RR_SLOP	DX_BARE:Diet2D
0.505345781991741	1	RR_SLOP	DX_BARE:Diet20
0.988926572482071	1	RR_SLOP	DX_BARE:Diet40
0.905438665069411	1	RR_TAVG	DX_BARE:Diet1D
0.311326950597661	1	RR_TAVG	DX_BARE:Diet2D
0.48325020013288	1	RR_TAVG	DX_BARE:Diet20
0.979262327623427	1	RR_TAVG	DX_BARE:Diet40
0.313960144280963	1	WR_DDAY	DX_BARE:Diet1D
0.52378129544759	1	WR_DDAY	DX_BARE:Diet2D
0.665640618908162	1	WR_DDAY	DX_BARE:Diet20
0.208360530460548	1	WR_DDAY	DX_BARE:Diet40
0.483397110014526	1	WR_DIST	DX_BARE:Diet1D
0.684451285996149	1	WR_DIST	DX_BARE:Diet2D
0.671203868398659	1	WR_DIST	DX_BARE:Diet20
0.843177837015095	1	WR_DIST	DX_BARE:Diet40
0.593551733234856	1	WR_DNIG	DX_BARE:Diet1D
0.776339462398615	1	WR_DNIG	DX_BARE:Diet2D
0.725953409762949	1	WR_DNIG	DX_BARE:Diet20
0.979190241575	1	WR_DNIG	DX_BARE:Diet40
0.693436836852903	1	WR_MDAY	DX_BARE:Diet1D
0.537304564799943	1	WR_MDAY	DX_BARE:Diet2D
0.854498253863802	1	WR_MDAY	DX_BARE:Diet20
0.801948233733182	1	WR_MDAY	DX_BARE:Diet40
0.811529077215242	1	WR_MNIG	DX_BARE:Diet1D
0.924528183073443	1	WR_MNIG	DX_BARE:Diet2D
0.981764258313258	1	WR_MNIG	DX_BARE:Diet20
0.949936581481504	1	WR_MNIG	DX_BARE:Diet40
0.683136402113444	1	WR_MSPE	DX_BARE:Diet1D
0.750317449582188	1	WR_MSPE	DX_BARE:Diet2D
0.975370469383848	1	WR_MSPE	DX_BARE:Diet20
0.490613108318496	1	WR_MSPE	DX_BARE:Diet40
0.300388239972717	1	WR_TDAY	DX_BARE:Diet1D
0.755131391727836	1	WR_TDAY	DX_BARE:Diet2D
0.877045278617177	1	WR_TDAY	DX_BARE:Diet20
0.210692486687069	1	WR_TDAY	DX_BARE:Diet40
0.534993936562367	1	WR_TNIG	DX_BARE:Diet1D
0.828609544209123	1	WR_TNIG	DX_BARE:Diet2D
0.489402896011069	1	WR_TNIG	DX_BARE:Diet20
0.858278200202658	1	WR_TNIG	DX_BARE:Diet40
0.88366663450268	1	AS_SLOP	DX_BODY:Diet1D
0.578539989334622	1	AS_SLOP	DX_BODY:Diet2D
0.622772326537381	1	AS_SLOP	DX_BODY:Diet20
0.046742338818595	1	AS_SLOP	DX_BODY:Diet40
0.597233644277535	1	AS_TAUC	DX_BODY:Diet1D
0.693898723941144	1	AS_TAUC	DX_BODY:Diet2D
0.34523861617762	1	AS_TAUC	DX_BODY:Diet20
0.963295313225278	1	AS_TAUC	DX_BODY:Diet40
0.694748199180447	1	AS_XINF	DX_BODY:Diet1D
0.572372306715696	1	AS_XINF	DX_BODY:Diet2D
0.666317002288912	1	AS_XINF	DX_BODY:Diet20
0.942720399569913	1	AS_XINF	DX_BODY:Diet40
0.275661175796309	1	AS_YINF	DX_BODY:Diet1D
0.885361519652585	1	AS_YINF	DX_BODY:Diet2D
0.103288938387268	1	AS_YINF	DX_BODY:Diet20
0.752508623491618	1	AS_YINF	DX_BODY:Diet40
0.649842494843884	1	DX_BARE	DX_BODY:Diet1D
0.0865034758617743	1	DX_BARE	DX_BODY:Diet2D
0.830709679217732	1	DX_BARE	DX_BODY:Diet20
0.744565877289026	1	DX_BARE	DX_BODY:Diet40
0.330571455256696	1	DX_BOMC	DX_BODY:Diet1D
0.0275588992109016	1	DX_BOMC	DX_BODY:Diet2D
0.395489717826755	1	DX_BOMC	DX_BODY:Diet20
0.48780961171511	1	DX_BOMC	DX_BODY:Diet40
0.17605381182772	1	DX_BOMD	DX_BODY:Diet1D
0.033755749089516	1	DX_BOMD	DX_BODY:Diet2D
0.201182641062087	1	DX_BOMD	DX_BODY:Diet20
0.0551282621689717	1	DX_BOMD	DX_BODY:Diet40
0.746865247348906	1	DX_PFAT	DX_BODY:Diet1D
0.902249718899779	1	DX_PFAT	DX_BODY:Diet2D
0.780171842774224	1	DX_PFAT	DX_BODY:Diet20
0.0484985817531127	1	DX_PFAT	DX_BODY:Diet40
0.520439650469945	1	DX_SIZE	DX_BODY:Diet1D
0.180023121286834	1	DX_SIZE	DX_BODY:Diet2D
0.934479125800317	1	DX_SIZE	DX_BODY:Diet20
0.794822550183127	1	DX_SIZE	DX_BODY:Diet40
0.0645733999208976	1	DX_TARE	DX_BODY:Diet1D
0.249348697095443	1	DX_TARE	DX_BODY:Diet2D
0.614969405183383	1	DX_TARE	DX_BODY:Diet20
0.174639345170678	1	DX_TARE	DX_BODY:Diet40
0.187928983182034	1	DX_TTME	DX_BODY:Diet1D
0.0296230953667697	1	DX_TTME	DX_BODY:Diet2D
0.666290878689228	1	DX_TTME	DX_BODY:Diet20
0.433332075433435	1	DX_TTME	DX_BODY:Diet40
0.781540315678024	1	EC_COUT	DX_BODY:Diet1D
0.656154440072047	1	EC_COUT	DX_BODY:Diet2D
0.00748984932365919	1	EC_COUT	DX_BODY:Diet20
0.0869889776910097	1	EC_COUT	DX_BODY:Diet40
0.829968534488002	1	EC_EFRA	DX_BODY:Diet1D
0.448849287402756	1	EC_EFRA	DX_BODY:Diet2D
0.0347980457025336	1	EC_EFRA	DX_BODY:Diet20
0.131742879384286	1	EC_EFRA	DX_BODY:Diet40
0.212441069365783	1	EC_HRAT	DX_BODY:Diet1D
0.742103002413501	1	EC_HRAT	DX_BODY:Diet2D
0.822576271917375	1	EC_HRAT	DX_BODY:Diet20
0.964474270617508	1	EC_HRAT	DX_BODY:Diet40
0.0201155252517503	1	EC_IVSD	DX_BODY:Diet1D
0.0735953781683403	1	EC_IVSD	DX_BODY:Diet2D
0.999319295349391	1	EC_IVSD	DX_BODY:Diet20
0.0291169027761239	1	EC_IVSD	DX_BODY:Diet40
0.454709205060159	1	EC_IVSS	DX_BODY:Diet1D
0.524470246651519	1	EC_IVSS	DX_BODY:Diet2D
0.0581247206050239	1	EC_IVSS	DX_BODY:Diet20
0.433176409256131	1	EC_IVSS	DX_BODY:Diet40
0.983151017943698	1	EC_LVID	DX_BODY:Diet1D
0.815143565875385	1	EC_LVID	DX_BODY:Diet2D
0.602014362036285	1	EC_LVID	DX_BODY:Diet20
0.75485788317323	1	EC_LVID	DX_BODY:Diet40
0.896186827987532	1	EC_LVIS	DX_BODY:Diet1D
0.472972890222569	1	EC_LVIS	DX_BODY:Diet2D
0.300591738390878	1	EC_LVIS	DX_BODY:Diet20
0.479297271196201	1	EC_LVIS	DX_BODY:Diet40
0.378046603838889	1	EC_LVMA	DX_BODY:Diet1D
0.548622651995085	1	EC_LVMA	DX_BODY:Diet2D
0.231061768877746	1	EC_LVMA	DX_BODY:Diet20
0.33001764246077	1	EC_LVMA	DX_BODY:Diet40
0.300176926948092	1	EC_LVPD	DX_BODY:Diet1D
0.605121458740847	1	EC_LVPD	DX_BODY:Diet2D
0.0870101081029751	1	EC_LVPD	DX_BODY:Diet20
0.681328114543092	1	EC_LVPD	DX_BODY:Diet40
0.873838147678244	1	EC_LVPS	DX_BODY:Diet1D
0.534080955718784	1	EC_LVPS	DX_BODY:Diet2D
0.141539957248589	1	EC_LVPS	DX_BODY:Diet20
0.839508180544924	1	EC_LVPS	DX_BODY:Diet40
0.630865094114342	1	EC_STRO	DX_BODY:Diet1D
0.872109001419445	1	EC_STRO	DX_BODY:Diet2D
0.00650725108608717	1	EC_STRO	DX_BODY:Diet20
0.0579121309679502	1	EC_STRO	DX_BODY:Diet40
0.0660252685594503	1	GS_APAW	DX_BODY:Diet1D
0.0139877319690101	1	GS_APAW	DX_BODY:Diet2D
0.0824065789369007	1	GS_APAW	DX_BODY:Diet20
0.33199564199469	1	GS_APAW	DX_BODY:Diet40
0.0293592835771267	1	GS_FORE	DX_BODY:Diet1D
0.440546468912066	1	GS_FORE	DX_BODY:Diet2D
0.688707078743803	1	GS_FORE	DX_BODY:Diet20
0.986494958729934	1	GS_FORE	DX_BODY:Diet40
0.76298693772306	1	RR_FIRS	DX_BODY:Diet1D
0.463138516218766	1	RR_FIRS	DX_BODY:Diet2D
0.907981461053937	1	RR_FIRS	DX_BODY:Diet20
0.0745761498699949	1	RR_FIRS	DX_BODY:Diet40
0.733295282950238	1	RR_SLOP	DX_BODY:Diet1D
0.84061753486796	1	RR_SLOP	DX_BODY:Diet2D
0.805921381595261	1	RR_SLOP	DX_BODY:Diet20
0.0866653863638626	1	RR_SLOP	DX_BODY:Diet40
0.538671611589738	1	RR_TAVG	DX_BODY:Diet1D
0.761679762781174	1	RR_TAVG	DX_BODY:Diet2D
0.941914900914512	1	RR_TAVG	DX_BODY:Diet20
0.936458529225726	1	RR_TAVG	DX_BODY:Diet40
0.835705002680839	1	WR_DDAY	DX_BODY:Diet1D
0.578982229777242	1	WR_DDAY	DX_BODY:Diet2D
0.762838243124715	1	WR_DDAY	DX_BODY:Diet20
0.0540507709834217	1	WR_DDAY	DX_BODY:Diet40
0.935089902043539	1	WR_DIST	DX_BODY:Diet1D
0.561865521065474	1	WR_DIST	DX_BODY:Diet2D
0.977643434798445	1	WR_DIST	DX_BODY:Diet20
0.139284247678954	1	WR_DIST	DX_BODY:Diet40
0.946609293121973	1	WR_DNIG	DX_BODY:Diet1D
0.602748831161151	1	WR_DNIG	DX_BODY:Diet2D
0.980730071613543	1	WR_DNIG	DX_BODY:Diet20
0.205031548840731	1	WR_DNIG	DX_BODY:Diet40
0.553212382346833	1	WR_MDAY	DX_BODY:Diet1D
0.803694062881438	1	WR_MDAY	DX_BODY:Diet2D
0.68303432367657	1	WR_MDAY	DX_BODY:Diet20
0.286253898725178	1	WR_MDAY	DX_BODY:Diet40
0.625687602367414	1	WR_MNIG	DX_BODY:Diet1D
0.971220415827472	1	WR_MNIG	DX_BODY:Diet2D
0.937786517232596	1	WR_MNIG	DX_BODY:Diet20
0.30708967845752	1	WR_MNIG	DX_BODY:Diet40
0.299387667440179	1	WR_MSPE	DX_BODY:Diet1D
0.512234482907757	1	WR_MSPE	DX_BODY:Diet2D
0.597468606516223	1	WR_MSPE	DX_BODY:Diet20
0.587465045737633	1	WR_MSPE	DX_BODY:Diet40
0.902006705697012	1	WR_TDAY	DX_BODY:Diet1D
0.821972052894845	1	WR_TDAY	DX_BODY:Diet2D
0.454406567297089	1	WR_TDAY	DX_BODY:Diet20
0.087625365872675	1	WR_TDAY	DX_BODY:Diet40
0.710232089447032	1	WR_TNIG	DX_BODY:Diet1D
0.856177471705731	1	WR_TNIG	DX_BODY:Diet2D
0.607036239545637	1	WR_TNIG	DX_BODY:Diet20
0.270145774817924	1	WR_TNIG	DX_BODY:Diet40
0.94408145687077	1	AS_SLOP	DX_BOMC:Diet1D
0.816964555983669	1	AS_SLOP	DX_BOMC:Diet2D
0.802285112376836	1	AS_SLOP	DX_BOMC:Diet20
0.990495722947403	1	AS_SLOP	DX_BOMC:Diet40
0.263577126256414	1	AS_TAUC	DX_BOMC:Diet1D
0.430793017043678	1	AS_TAUC	DX_BOMC:Diet2D
0.892868567104591	1	AS_TAUC	DX_BOMC:Diet20
0.265349490721058	1	AS_TAUC	DX_BOMC:Diet40
0.539766507395584	1	AS_XINF	DX_BOMC:Diet1D
0.612538990509509	1	AS_XINF	DX_BOMC:Diet2D
0.184693769733359	1	AS_XINF	DX_BOMC:Diet20
0.107137181604999	1	AS_XINF	DX_BOMC:Diet40
0.293783091327703	1	AS_YINF	DX_BOMC:Diet1D
0.824916124976725	1	AS_YINF	DX_BOMC:Diet2D
0.5166715270101	1	AS_YINF	DX_BOMC:Diet20
0.988523445893794	1	AS_YINF	DX_BOMC:Diet40
0.422096137145804	1	DX_BARE	DX_BOMC:Diet1D
0.0282326731617855	1	DX_BARE	DX_BOMC:Diet2D
0.190876632894356	1	DX_BARE	DX_BOMC:Diet20
0.576466999664305	1	DX_BARE	DX_BOMC:Diet40
0.446974111048081	1	DX_BODY	DX_BOMC:Diet1D
0.978652268611214	1	DX_BODY	DX_BOMC:Diet2D
0.16050558937318	1	DX_BODY	DX_BOMC:Diet20
0.409436249479081	1	DX_BODY	DX_BOMC:Diet40
0.808905181596253	1	DX_BOMD	DX_BOMC:Diet1D
0.198011567396408	1	DX_BOMD	DX_BOMC:Diet2D
0.548288484796254	1	DX_BOMD	DX_BOMC:Diet20
0.42087816955278	1	DX_BOMD	DX_BOMC:Diet40
0.574318826660716	1	DX_PFAT	DX_BOMC:Diet1D
0.618502454647533	1	DX_PFAT	DX_BOMC:Diet2D
0.492831276327855	1	DX_PFAT	DX_BOMC:Diet20
0.262521248268749	1	DX_PFAT	DX_BOMC:Diet40
0.898534296730181	1	DX_SIZE	DX_BOMC:Diet1D
0.686303052392083	1	DX_SIZE	DX_BOMC:Diet2D
0.0514176022251316	1	DX_SIZE	DX_BOMC:Diet20
0.748577860043298	1	DX_SIZE	DX_BOMC:Diet40
0.569771073966817	1	DX_TARE	DX_BOMC:Diet1D
0.942869051990399	1	DX_TARE	DX_BOMC:Diet2D
0.345138144420475	1	DX_TARE	DX_BOMC:Diet20
0.789027358755593	1	DX_TARE	DX_BOMC:Diet40
0.466241082510965	1	DX_TTME	DX_BOMC:Diet1D
0.806657973072486	1	DX_TTME	DX_BOMC:Diet2D
0.199951032569724	1	DX_TTME	DX_BOMC:Diet20
0.402161159688162	1	DX_TTME	DX_BOMC:Diet40
0.990799582276429	1	EC_COUT	DX_BOMC:Diet1D
0.884596422922407	1	EC_COUT	DX_BOMC:Diet2D
0.323860992482172	1	EC_COUT	DX_BOMC:Diet20
0.474204407990844	1	EC_COUT	DX_BOMC:Diet40
0.373759734451108	1	EC_EFRA	DX_BOMC:Diet1D
0.672484729267909	1	EC_EFRA	DX_BOMC:Diet2D
0.268941886061014	1	EC_EFRA	DX_BOMC:Diet20
0.52731396396951	1	EC_EFRA	DX_BOMC:Diet40
0.640992927610854	1	EC_HRAT	DX_BOMC:Diet1D
0.828978324463608	1	EC_HRAT	DX_BOMC:Diet2D
0.932620000488444	1	EC_HRAT	DX_BOMC:Diet20
0.0810636290068294	1	EC_HRAT	DX_BOMC:Diet40
0.230760497180872	1	EC_IVSD	DX_BOMC:Diet1D
0.515430902021263	1	EC_IVSD	DX_BOMC:Diet2D
0.121040991228142	1	EC_IVSD	DX_BOMC:Diet20
0.160641274540677	1	EC_IVSD	DX_BOMC:Diet40
0.686301706719689	1	EC_IVSS	DX_BOMC:Diet1D
0.840977947934994	1	EC_IVSS	DX_BOMC:Diet2D
0.545053261774248	1	EC_IVSS	DX_BOMC:Diet20
0.788860411926446	1	EC_IVSS	DX_BOMC:Diet40
0.372015129859864	1	EC_LVID	DX_BOMC:Diet1D
0.786827105355386	1	EC_LVID	DX_BOMC:Diet2D
0.660562306144654	1	EC_LVID	DX_BOMC:Diet20
0.672937076761896	1	EC_LVID	DX_BOMC:Diet40
0.28159839705593	1	EC_LVIS	DX_BOMC:Diet1D
0.681855925131192	1	EC_LVIS	DX_BOMC:Diet2D
0.286389671161903	1	EC_LVIS	DX_BOMC:Diet20
0.532462909349678	1	EC_LVIS	DX_BOMC:Diet40
0.0697710616406223	1	EC_LVMA	DX_BOMC:Diet1D
0.664171127388567	1	EC_LVMA	DX_BOMC:Diet2D
0.178644225618454	1	EC_LVMA	DX_BOMC:Diet20
0.110089806657735	1	EC_LVMA	DX_BOMC:Diet40
0.439198774919787	1	EC_LVPD	DX_BOMC:Diet1D
0.727037609424025	1	EC_LVPD	DX_BOMC:Diet2D
0.0624603399905704	1	EC_LVPD	DX_BOMC:Diet20
0.240928918038193	1	EC_LVPD	DX_BOMC:Diet40
0.993139133332176	1	EC_LVPS	DX_BOMC:Diet1D
0.587516799357229	1	EC_LVPS	DX_BOMC:Diet2D
0.0585062708321271	1	EC_LVPS	DX_BOMC:Diet20
0.766311162567483	1	EC_LVPS	DX_BOMC:Diet40
0.890784975307134	1	EC_STRO	DX_BOMC:Diet1D
0.931145486186663	1	EC_STRO	DX_BOMC:Diet2D
0.301338717593855	1	EC_STRO	DX_BOMC:Diet20
0.84812469553272	1	EC_STRO	DX_BOMC:Diet40
0.571163338946449	1	GS_APAW	DX_BOMC:Diet1D
0.108866821227734	1	GS_APAW	DX_BOMC:Diet2D
0.900690019468674	1	GS_APAW	DX_BOMC:Diet20
0.389999057289122	1	GS_APAW	DX_BOMC:Diet40
0.0542990456271648	1	GS_FORE	DX_BOMC:Diet1D
0.801558095289301	1	GS_FORE	DX_BOMC:Diet2D
0.503116954662777	1	GS_FORE	DX_BOMC:Diet20
0.146160447505602	1	GS_FORE	DX_BOMC:Diet40
0.340132556160719	1	RR_FIRS	DX_BOMC:Diet1D
0.578200535986816	1	RR_FIRS	DX_BOMC:Diet2D
0.269011161467492	1	RR_FIRS	DX_BOMC:Diet20
0.841305466025643	1	RR_FIRS	DX_BOMC:Diet40
0.358898017445241	1	RR_SLOP	DX_BOMC:Diet1D
0.98660583731368	1	RR_SLOP	DX_BOMC:Diet2D
0.509871783888968	1	RR_SLOP	DX_BOMC:Diet20
0.696506750735108	1	RR_SLOP	DX_BOMC:Diet40
0.589861438115226	1	RR_TAVG	DX_BOMC:Diet1D
0.130525311898806	1	RR_TAVG	DX_BOMC:Diet2D
0.326621195023597	1	RR_TAVG	DX_BOMC:Diet20
0.698861428422216	1	RR_TAVG	DX_BOMC:Diet40
0.560613354034287	1	WR_DDAY	DX_BOMC:Diet1D
0.431450939237415	1	WR_DDAY	DX_BOMC:Diet2D
0.949122663706721	1	WR_DDAY	DX_BOMC:Diet20
0.600854475062987	1	WR_DDAY	DX_BOMC:Diet40
0.707382242249841	1	WR_DIST	DX_BOMC:Diet1D
0.961974811014041	1	WR_DIST	DX_BOMC:Diet2D
0.787521147350288	1	WR_DIST	DX_BOMC:Diet20
0.375611682590594	1	WR_DIST	DX_BOMC:Diet40
0.8002838948681	1	WR_DNIG	DX_BOMC:Diet1D
0.852644737532094	1	WR_DNIG	DX_BOMC:Diet2D
0.732130957010001	1	WR_DNIG	DX_BOMC:Diet20
0.271497250641012	1	WR_DNIG	DX_BOMC:Diet40
0.908360516112751	1	WR_MDAY	DX_BOMC:Diet1D
0.595599831015188	1	WR_MDAY	DX_BOMC:Diet2D
0.610825831540954	1	WR_MDAY	DX_BOMC:Diet20
0.780076836637825	1	WR_MDAY	DX_BOMC:Diet40
0.848100346557358	1	WR_MNIG	DX_BOMC:Diet1D
0.798747798066625	1	WR_MNIG	DX_BOMC:Diet2D
0.626015587728297	1	WR_MNIG	DX_BOMC:Diet20
0.465582494868684	1	WR_MNIG	DX_BOMC:Diet40
0.827475028710657	1	WR_MSPE	DX_BOMC:Diet1D
0.775173554512646	1	WR_MSPE	DX_BOMC:Diet2D
0.568610481117046	1	WR_MSPE	DX_BOMC:Diet20
0.844279962773494	1	WR_MSPE	DX_BOMC:Diet40
0.587956927831121	1	WR_TDAY	DX_BOMC:Diet1D
0.668405127650056	1	WR_TDAY	DX_BOMC:Diet2D
0.693100019860048	1	WR_TDAY	DX_BOMC:Diet20
0.267624195745134	1	WR_TDAY	DX_BOMC:Diet40
0.687656951716328	1	WR_TNIG	DX_BOMC:Diet1D
0.974957203526523	1	WR_TNIG	DX_BOMC:Diet2D
0.699125941335881	1	WR_TNIG	DX_BOMC:Diet20
0.49247158990906	1	WR_TNIG	DX_BOMC:Diet40
0.883837817201131	1	AS_SLOP	DX_BOMD:Diet1D
0.841222856327421	1	AS_SLOP	DX_BOMD:Diet2D
0.208050200015929	1	AS_SLOP	DX_BOMD:Diet20
0.862282109316923	1	AS_SLOP	DX_BOMD:Diet40
0.69955920145607	1	AS_TAUC	DX_BOMD:Diet1D
0.551054701360435	1	AS_TAUC	DX_BOMD:Diet2D
0.675677815380655	1	AS_TAUC	DX_BOMD:Diet20
0.41984452890603	1	AS_TAUC	DX_BOMD:Diet40
0.336090684915843	1	AS_XINF	DX_BOMD:Diet1D
0.950541192008059	1	AS_XINF	DX_BOMD:Diet2D
0.460950891560084	1	AS_XINF	DX_BOMD:Diet20
0.404627917730459	1	AS_XINF	DX_BOMD:Diet40
0.978240173041678	1	AS_YINF	DX_BOMD:Diet1D
0.426493904791925	1	AS_YINF	DX_BOMD:Diet2D
0.283004821594241	1	AS_YINF	DX_BOMD:Diet20
0.989288313652724	1	AS_YINF	DX_BOMD:Diet40
0.677464169974573	1	DX_BARE	DX_BOMD:Diet1D
0.279673845992667	1	DX_BARE	DX_BOMD:Diet2D
0.11370590152537	1	DX_BARE	DX_BOMD:Diet20
0.55158176464543	1	DX_BARE	DX_BOMD:Diet40
0.718011202023062	1	DX_BODY	DX_BOMD:Diet1D
0.20287392817581	1	DX_BODY	DX_BOMD:Diet2D
0.827803262944197	1	DX_BODY	DX_BOMD:Diet20
0.744797776939536	1	DX_BODY	DX_BOMD:Diet40
0.893108355895562	1	DX_BOMC	DX_BOMD:Diet1D
0.585592238762086	1	DX_BOMC	DX_BOMD:Diet2D
0.212864536909096	1	DX_BOMC	DX_BOMD:Diet20
0.303642688877585	1	DX_BOMC	DX_BOMD:Diet40
0.723085821606446	1	DX_PFAT	DX_BOMD:Diet1D
0.642419352386613	1	DX_PFAT	DX_BOMD:Diet2D
0.299572505732973	1	DX_PFAT	DX_BOMD:Diet20
0.537432566340669	1	DX_PFAT	DX_BOMD:Diet40
0.215343212331715	1	DX_SIZE	DX_BOMD:Diet1D
0.55471050721632	1	DX_SIZE	DX_BOMD:Diet2D
0.61829688187618	1	DX_SIZE	DX_BOMD:Diet20
0.7163210631786	1	DX_SIZE	DX_BOMD:Diet40
0.712552688506905	1	DX_TARE	DX_BOMD:Diet1D
0.485632566752856	1	DX_TARE	DX_BOMD:Diet2D
0.532498837514549	1	DX_TARE	DX_BOMD:Diet20
0.347792137404848	1	DX_TARE	DX_BOMD:Diet40
0.694462288025064	1	DX_TTME	DX_BOMD:Diet1D
0.313199373635168	1	DX_TTME	DX_BOMD:Diet2D
0.783297830487161	1	DX_TTME	DX_BOMD:Diet20
0.726377818092753	1	DX_TTME	DX_BOMD:Diet40
0.417917554094833	1	EC_COUT	DX_BOMD:Diet1D
0.869627756395509	1	EC_COUT	DX_BOMD:Diet2D
0.47579845637946	1	EC_COUT	DX_BOMD:Diet20
0.556138626597971	1	EC_COUT	DX_BOMD:Diet40
0.186362748047963	1	EC_EFRA	DX_BOMD:Diet1D
0.339820402631938	1	EC_EFRA	DX_BOMD:Diet2D
0.0144404878066168	1	EC_EFRA	DX_BOMD:Diet20
0.17675785883615	1	EC_EFRA	DX_BOMD:Diet40
0.684244551130626	1	EC_HRAT	DX_BOMD:Diet1D
0.681299784899497	1	EC_HRAT	DX_BOMD:Diet2D
0.81238438109341	1	EC_HRAT	DX_BOMD:Diet20
0.736142403417727	1	EC_HRAT	DX_BOMD:Diet40
0.0958262942603005	1	EC_IVSD	DX_BOMD:Diet1D
0.612289750927242	1	EC_IVSD	DX_BOMD:Diet2D
0.529799697896373	1	EC_IVSD	DX_BOMD:Diet20
0.227780371737124	1	EC_IVSD	DX_BOMD:Diet40
0.399559783575277	1	EC_IVSS	DX_BOMD:Diet1D
0.947317114689934	1	EC_IVSS	DX_BOMD:Diet2D
0.776963443929605	1	EC_IVSS	DX_BOMD:Diet20
0.728520842413704	1	EC_IVSS	DX_BOMD:Diet40
0.0600856808976618	1	EC_LVID	DX_BOMD:Diet1D
0.435231415716477	1	EC_LVID	DX_BOMD:Diet2D
0.0622985112861112	1	EC_LVID	DX_BOMD:Diet20
0.518875734272904	1	EC_LVID	DX_BOMD:Diet40
0.0714957354287291	1	EC_LVIS	DX_BOMD:Diet1D
0.359049256383317	1	EC_LVIS	DX_BOMD:Diet2D
0.00912111018443433	1	EC_LVIS	DX_BOMD:Diet20
0.251763085710835	1	EC_LVIS	DX_BOMD:Diet40
0.0020723439583561	1	EC_LVMA	DX_BOMD:Diet1D
0.358645470587091	1	EC_LVMA	DX_BOMD:Diet2D
0.62084086319858	1	EC_LVMA	DX_BOMD:Diet20
0.118734725900173	1	EC_LVMA	DX_BOMD:Diet40
0.155284266178046	1	EC_LVPD	DX_BOMD:Diet1D
0.903101587591362	1	EC_LVPD	DX_BOMD:Diet2D
0.161256704450862	1	EC_LVPD	DX_BOMD:Diet20
0.26977273153626	1	EC_LVPD	DX_BOMD:Diet40
0.667780189368524	1	EC_LVPS	DX_BOMD:Diet1D
0.467446810491896	1	EC_LVPS	DX_BOMD:Diet2D
0.0493722276378642	1	EC_LVPS	DX_BOMD:Diet20
0.906346918254242	1	EC_LVPS	DX_BOMD:Diet40
0.484454797400802	1	EC_STRO	DX_BOMD:Diet1D
0.994629732342325	1	EC_STRO	DX_BOMD:Diet2D
0.333217883101383	1	EC_STRO	DX_BOMD:Diet20
0.532664834581358	1	EC_STRO	DX_BOMD:Diet40
0.901774497072971	1	GS_APAW	DX_BOMD:Diet1D
0.411804346402668	1	GS_APAW	DX_BOMD:Diet2D
0.902973850332797	1	GS_APAW	DX_BOMD:Diet20
0.995962482385837	1	GS_APAW	DX_BOMD:Diet40
0.0788334047377899	1	GS_FORE	DX_BOMD:Diet1D
0.732556805060184	1	GS_FORE	DX_BOMD:Diet2D
0.273541771898875	1	GS_FORE	DX_BOMD:Diet20
0.209311503765688	1	GS_FORE	DX_BOMD:Diet40
0.244682431579486	1	RR_FIRS	DX_BOMD:Diet1D
0.532955392581442	1	RR_FIRS	DX_BOMD:Diet2D
0.213780662904525	1	RR_FIRS	DX_BOMD:Diet20
0.266611067786371	1	RR_FIRS	DX_BOMD:Diet40
0.741107185985289	1	RR_SLOP	DX_BOMD:Diet1D
0.527971982390728	1	RR_SLOP	DX_BOMD:Diet2D
0.551564399925853	1	RR_SLOP	DX_BOMD:Diet20
0.432184838212275	1	RR_SLOP	DX_BOMD:Diet40
0.382776166774094	1	RR_TAVG	DX_BOMD:Diet1D
0.141840034010157	1	RR_TAVG	DX_BOMD:Diet2D
0.574491270159915	1	RR_TAVG	DX_BOMD:Diet20
0.692313182537901	1	RR_TAVG	DX_BOMD:Diet40
0.8371123536381	1	WR_DDAY	DX_BOMD:Diet1D
0.192482300979879	1	WR_DDAY	DX_BOMD:Diet2D
0.855257974554208	1	WR_DDAY	DX_BOMD:Diet20
0.515255081227844	1	WR_DDAY	DX_BOMD:Diet40
0.629041646976973	1	WR_DIST	DX_BOMD:Diet1D
0.724134464695521	1	WR_DIST	DX_BOMD:Diet2D
0.583712034016791	1	WR_DIST	DX_BOMD:Diet20
0.209909726408051	1	WR_DIST	DX_BOMD:Diet40
0.663375730802326	1	WR_DNIG	DX_BOMD:Diet1D
0.816778479351698	1	WR_DNIG	DX_BOMD:Diet2D
0.549613766928139	1	WR_DNIG	DX_BOMD:Diet20
0.183477761010923	1	WR_DNIG	DX_BOMD:Diet40
0.960087343158502	1	WR_MDAY	DX_BOMD:Diet1D
0.27515592306624	1	WR_MDAY	DX_BOMD:Diet2D
0.426779860589096	1	WR_MDAY	DX_BOMD:Diet20
0.452771923220078	1	WR_MDAY	DX_BOMD:Diet40
0.697205336077874	1	WR_MNIG	DX_BOMD:Diet1D
0.681867667210651	1	WR_MNIG	DX_BOMD:Diet2D
0.582757058105503	1	WR_MNIG	DX_BOMD:Diet20
0.184036325094642	1	WR_MNIG	DX_BOMD:Diet40
0.665817635409831	1	WR_MSPE	DX_BOMD:Diet1D
0.636782554875008	1	WR_MSPE	DX_BOMD:Diet2D
0.415785155245666	1	WR_MSPE	DX_BOMD:Diet20
0.239163472591443	1	WR_MSPE	DX_BOMD:Diet40
0.929985562785804	1	WR_TDAY	DX_BOMD:Diet1D
0.411556875404675	1	WR_TDAY	DX_BOMD:Diet2D
0.702762073709976	1	WR_TDAY	DX_BOMD:Diet20
0.721790389027203	1	WR_TDAY	DX_BOMD:Diet40
0.56133893601305	1	WR_TNIG	DX_BOMD:Diet1D
0.637511969269021	1	WR_TNIG	DX_BOMD:Diet2D
0.742570338538305	1	WR_TNIG	DX_BOMD:Diet20
0.71593722397086	1	WR_TNIG	DX_BOMD:Diet40
0.347744942980486	1	AS_SLOP	DX_PFAT:Diet1D
0.671827847954682	1	AS_SLOP	DX_PFAT:Diet2D
0.980852387848505	1	AS_SLOP	DX_PFAT:Diet20
0.106947434373931	1	AS_SLOP	DX_PFAT:Diet40
0.816362561865929	1	AS_TAUC	DX_PFAT:Diet1D
0.622811338085726	1	AS_TAUC	DX_PFAT:Diet2D
0.303345969772711	1	AS_TAUC	DX_PFAT:Diet20
0.757738479081801	1	AS_TAUC	DX_PFAT:Diet40
0.468647319314847	1	AS_XINF	DX_PFAT:Diet1D
0.715444205170169	1	AS_XINF	DX_PFAT:Diet2D
0.198040575736417	1	AS_XINF	DX_PFAT:Diet20
0.375741857499038	1	AS_XINF	DX_PFAT:Diet40
0.736155532840379	1	AS_YINF	DX_PFAT:Diet1D
0.806867380119057	1	AS_YINF	DX_PFAT:Diet2D
0.626637512310418	1	AS_YINF	DX_PFAT:Diet20
0.773390501141132	1	AS_YINF	DX_PFAT:Diet40
0.7435078597208	1	DX_BARE	DX_PFAT:Diet1D
0.115974825653709	1	DX_BARE	DX_PFAT:Diet2D
0.0561484348347869	1	DX_BARE	DX_PFAT:Diet20
0.0556074733171056	1	DX_BARE	DX_PFAT:Diet40
0.226160535635154	1	DX_BODY	DX_PFAT:Diet1D
0.216005582278684	1	DX_BODY	DX_PFAT:Diet2D
0.155040560094035	1	DX_BODY	DX_PFAT:Diet20
0.0502360721696214	1	DX_BODY	DX_PFAT:Diet40
0.918247500719455	1	DX_BOMC	DX_PFAT:Diet1D
0.146481989177204	1	DX_BOMC	DX_PFAT:Diet2D
0.0532078292925722	1	DX_BOMC	DX_PFAT:Diet20
0.360637102991156	1	DX_BOMC	DX_PFAT:Diet40
0.683011983006359	1	DX_BOMD	DX_PFAT:Diet1D
0.61092711625381	1	DX_BOMD	DX_PFAT:Diet2D
0.2231571078895	1	DX_BOMD	DX_PFAT:Diet20
0.49569045388664	1	DX_BOMD	DX_PFAT:Diet40
0.405578764054496	1	DX_SIZE	DX_PFAT:Diet1D
0.779545449407048	1	DX_SIZE	DX_PFAT:Diet2D
0.113077656310025	1	DX_SIZE	DX_PFAT:Diet20
0.790257151576732	1	DX_SIZE	DX_PFAT:Diet40
0.0972114786075016	1	DX_TARE	DX_PFAT:Diet1D
0.0733340778345975	1	DX_TARE	DX_PFAT:Diet2D
0.0191899162236327	1	DX_TARE	DX_PFAT:Diet20
0.039598688149491	1	DX_TARE	DX_PFAT:Diet40
0.39167548543155	1	DX_TTME	DX_PFAT:Diet1D
0.152018598591702	1	DX_TTME	DX_PFAT:Diet2D
0.178315688617834	1	DX_TTME	DX_PFAT:Diet20
0.0606657748776664	1	DX_TTME	DX_PFAT:Diet40
0.793064433880568	1	EC_COUT	DX_PFAT:Diet1D
0.439672699446657	1	EC_COUT	DX_PFAT:Diet2D
0.341109083246772	1	EC_COUT	DX_PFAT:Diet20
0.371471726508471	1	EC_COUT	DX_PFAT:Diet40
0.309822094282153	1	EC_EFRA	DX_PFAT:Diet1D
0.198827188892745	1	EC_EFRA	DX_PFAT:Diet2D
0.457995001220653	1	EC_EFRA	DX_PFAT:Diet20
0.588553465084156	1	EC_EFRA	DX_PFAT:Diet40
0.355559997242549	1	EC_HRAT	DX_PFAT:Diet1D
0.563992695960084	1	EC_HRAT	DX_PFAT:Diet2D
0.702279303074708	1	EC_HRAT	DX_PFAT:Diet20
0.595900120314423	1	EC_HRAT	DX_PFAT:Diet40
0.355622206593756	1	EC_IVSD	DX_PFAT:Diet1D
0.486555282271671	1	EC_IVSD	DX_PFAT:Diet2D
0.929269346677889	1	EC_IVSD	DX_PFAT:Diet20
0.00512104156958673	1	EC_IVSD	DX_PFAT:Diet40
0.640825905793708	1	EC_IVSS	DX_PFAT:Diet1D
0.845377340967635	1	EC_IVSS	DX_PFAT:Diet2D
0.172544965699844	1	EC_IVSS	DX_PFAT:Diet20
0.863559381605276	1	EC_IVSS	DX_PFAT:Diet40
0.360075892034718	1	EC_LVID	DX_PFAT:Diet1D
0.781965736613494	1	EC_LVID	DX_PFAT:Diet2D
0.749124365828284	1	EC_LVID	DX_PFAT:Diet20
0.507784559978482	1	EC_LVID	DX_PFAT:Diet40
0.306306650850002	1	EC_LVIS	DX_PFAT:Diet1D
0.353217393148342	1	EC_LVIS	DX_PFAT:Diet2D
0.699598522072554	1	EC_LVIS	DX_PFAT:Diet20
0.960226379493704	1	EC_LVIS	DX_PFAT:Diet40
0.3280455488183	1	EC_LVMA	DX_PFAT:Diet1D
0.976519742346423	1	EC_LVMA	DX_PFAT:Diet2D
0.215447375941886	1	EC_LVMA	DX_PFAT:Diet20
0.405480974586958	1	EC_LVMA	DX_PFAT:Diet40
0.088445717572104	1	EC_LVPD	DX_PFAT:Diet1D
0.742881161988681	1	EC_LVPD	DX_PFAT:Diet2D
0.0753685809233121	1	EC_LVPD	DX_PFAT:Diet20
0.881635204547195	1	EC_LVPD	DX_PFAT:Diet40
0.821403946163911	1	EC_LVPS	DX_PFAT:Diet1D
0.236565398354733	1	EC_LVPS	DX_PFAT:Diet2D
0.546169699429898	1	EC_LVPS	DX_PFAT:Diet20
0.860799339954976	1	EC_LVPS	DX_PFAT:Diet40
0.807373278509733	1	EC_STRO	DX_PFAT:Diet1D
0.6358123422256	1	EC_STRO	DX_PFAT:Diet2D
0.235219637823361	1	EC_STRO	DX_PFAT:Diet20
0.210403325638262	1	EC_STRO	DX_PFAT:Diet40
0.831096542855757	1	GS_APAW	DX_PFAT:Diet1D
0.505790162574362	1	GS_APAW	DX_PFAT:Diet2D
0.213984647726718	1	GS_APAW	DX_PFAT:Diet20
0.679767375270348	1	GS_APAW	DX_PFAT:Diet40
0.880641494519632	1	GS_FORE	DX_PFAT:Diet1D
0.638317325530678	1	GS_FORE	DX_PFAT:Diet2D
0.154613295794587	1	GS_FORE	DX_PFAT:Diet20
0.4540144980934	1	GS_FORE	DX_PFAT:Diet40
0.145879502446081	1	RR_FIRS	DX_PFAT:Diet1D
0.68908506851967	1	RR_FIRS	DX_PFAT:Diet2D
0.93004206910424	1	RR_FIRS	DX_PFAT:Diet20
0.185090559590077	1	RR_FIRS	DX_PFAT:Diet40
0.289673215924315	1	RR_SLOP	DX_PFAT:Diet1D
0.357470319089858	1	RR_SLOP	DX_PFAT:Diet2D
0.82816792737797	1	RR_SLOP	DX_PFAT:Diet20
0.248253329759894	1	RR_SLOP	DX_PFAT:Diet40
0.175460772683926	1	RR_TAVG	DX_PFAT:Diet1D
0.861994025579844	1	RR_TAVG	DX_PFAT:Diet2D
0.531716879138423	1	RR_TAVG	DX_PFAT:Diet20
0.355859544246407	1	RR_TAVG	DX_PFAT:Diet40
0.388312703110653	1	WR_DDAY	DX_PFAT:Diet1D
0.572746991883007	1	WR_DDAY	DX_PFAT:Diet2D
0.376457625186828	1	WR_DDAY	DX_PFAT:Diet20
0.0295460765844786	1	WR_DDAY	DX_PFAT:Diet40
0.266558218356532	1	WR_DIST	DX_PFAT:Diet1D
0.50249069945281	1	WR_DIST	DX_PFAT:Diet2D
0.11281376913256	1	WR_DIST	DX_PFAT:Diet20
0.110575945154521	1	WR_DIST	DX_PFAT:Diet40
0.28555117433809	1	WR_DNIG	DX_PFAT:Diet1D
0.507128963508866	1	WR_DNIG	DX_PFAT:Diet2D
0.116614004093812	1	WR_DNIG	DX_PFAT:Diet20
0.168194862722812	1	WR_DNIG	DX_PFAT:Diet40
0.720672260006032	1	WR_MDAY	DX_PFAT:Diet1D
0.205104780638726	1	WR_MDAY	DX_PFAT:Diet2D
0.497991407130449	1	WR_MDAY	DX_PFAT:Diet20
0.530720050794652	1	WR_MDAY	DX_PFAT:Diet40
0.0697504664155403	1	WR_MNIG	DX_PFAT:Diet1D
0.238178352591973	1	WR_MNIG	DX_PFAT:Diet2D
0.153179417605516	1	WR_MNIG	DX_PFAT:Diet20
0.0382101297579332	1	WR_MNIG	DX_PFAT:Diet40
0.00841071051267139	1	WR_MSPE	DX_PFAT:Diet1D
0.253792518378521	1	WR_MSPE	DX_PFAT:Diet2D
0.376951988112987	1	WR_MSPE	DX_PFAT:Diet20
0.195257291660964	1	WR_MSPE	DX_PFAT:Diet40
0.646218410225918	1	WR_TDAY	DX_PFAT:Diet1D
0.313056183383114	1	WR_TDAY	DX_PFAT:Diet2D
0.199268915787425	1	WR_TDAY	DX_PFAT:Diet20
0.245910590389158	1	WR_TDAY	DX_PFAT:Diet40
0.62026667249209	1	WR_TNIG	DX_PFAT:Diet1D
0.229765178237773	1	WR_TNIG	DX_PFAT:Diet2D
0.0332126363359949	1	WR_TNIG	DX_PFAT:Diet20
0.263071186139948	1	WR_TNIG	DX_PFAT:Diet40
0.526418739220644	1	AS_SLOP	DX_SIZE:Diet1D
0.562366816061425	1	AS_SLOP	DX_SIZE:Diet2D
0.162545247921152	1	AS_SLOP	DX_SIZE:Diet20
0.184379857997296	1	AS_SLOP	DX_SIZE:Diet40
0.435097849833251	1	AS_TAUC	DX_SIZE:Diet1D
0.165482556569671	1	AS_TAUC	DX_SIZE:Diet2D
0.432099570940716	1	AS_TAUC	DX_SIZE:Diet20
0.26400605113756	1	AS_TAUC	DX_SIZE:Diet40
0.435276534030925	1	AS_XINF	DX_SIZE:Diet1D
0.312362052354898	1	AS_XINF	DX_SIZE:Diet2D
0.138620492640637	1	AS_XINF	DX_SIZE:Diet20
0.598162451014464	1	AS_XINF	DX_SIZE:Diet40
0.189211363864612	1	AS_YINF	DX_SIZE:Diet1D
0.497994211711227	1	AS_YINF	DX_SIZE:Diet2D
0.570564996019465	1	AS_YINF	DX_SIZE:Diet20
0.36218102012477	1	AS_YINF	DX_SIZE:Diet40
0.873608100289103	1	DX_BARE	DX_SIZE:Diet1D
0.817266499514009	1	DX_BARE	DX_SIZE:Diet2D
0.376385002555815	1	DX_BARE	DX_SIZE:Diet20
0.760222265686307	1	DX_BARE	DX_SIZE:Diet40
0.0313319603697713	1	DX_BODY	DX_SIZE:Diet1D
0.0210060200053348	1	DX_BODY	DX_SIZE:Diet2D
0.0368802864015778	1	DX_BODY	DX_SIZE:Diet20
0.0225537089761444	1	DX_BODY	DX_SIZE:Diet40
0.352843954590428	1	DX_BOMC	DX_SIZE:Diet1D
0.757621651174322	1	DX_BOMC	DX_SIZE:Diet2D
0.579456891410301	1	DX_BOMC	DX_SIZE:Diet20
0.738240470779006	1	DX_BOMC	DX_SIZE:Diet40
0.0819742950322274	1	DX_BOMD	DX_SIZE:Diet1D
0.623821416416432	1	DX_BOMD	DX_SIZE:Diet2D
0.879437421567961	1	DX_BOMD	DX_SIZE:Diet20
0.532383277874728	1	DX_BOMD	DX_SIZE:Diet40
0.133852900488581	1	DX_PFAT	DX_SIZE:Diet1D
0.509016619402608	1	DX_PFAT	DX_SIZE:Diet2D
0.0713518442660653	1	DX_PFAT	DX_SIZE:Diet20
0.799453058129035	1	DX_PFAT	DX_SIZE:Diet40
0.0133972419993114	1	DX_TARE	DX_SIZE:Diet1D
0.0326938358764764	1	DX_TARE	DX_SIZE:Diet2D
0.116039920083702	1	DX_TARE	DX_SIZE:Diet20
0.287138053849683	1	DX_TARE	DX_SIZE:Diet40
0.042323805862264	1	DX_TTME	DX_SIZE:Diet1D
0.0169188049240765	1	DX_TTME	DX_SIZE:Diet2D
0.0536190776062603	1	DX_TTME	DX_SIZE:Diet20
0.02839897157751	1	DX_TTME	DX_SIZE:Diet40
0.424061736535416	1	EC_COUT	DX_SIZE:Diet1D
0.33374940021081	1	EC_COUT	DX_SIZE:Diet2D
0.0282637313462188	1	EC_COUT	DX_SIZE:Diet20
0.0109460598090042	1	EC_COUT	DX_SIZE:Diet40
0.484045006985892	1	EC_EFRA	DX_SIZE:Diet1D
0.62018308861871	1	EC_EFRA	DX_SIZE:Diet2D
0.141942239386264	1	EC_EFRA	DX_SIZE:Diet20
0.00778254399922107	1	EC_EFRA	DX_SIZE:Diet40
0.600351821669501	1	EC_HRAT	DX_SIZE:Diet1D
0.790144092108976	1	EC_HRAT	DX_SIZE:Diet2D
0.642580312339304	1	EC_HRAT	DX_SIZE:Diet20
0.395562314972764	1	EC_HRAT	DX_SIZE:Diet40
0.0124239235530136	1	EC_IVSD	DX_SIZE:Diet1D
0.492094186666594	1	EC_IVSD	DX_SIZE:Diet2D
0.262725093973238	1	EC_IVSD	DX_SIZE:Diet20
0.0805617597189367	1	EC_IVSD	DX_SIZE:Diet40
0.561439775330015	1	EC_IVSS	DX_SIZE:Diet1D
0.66916350188331	1	EC_IVSS	DX_SIZE:Diet2D
0.0966786889070039	1	EC_IVSS	DX_SIZE:Diet20
0.478205698103011	1	EC_IVSS	DX_SIZE:Diet40
0.750922172564872	1	EC_LVID	DX_SIZE:Diet1D
0.487951723638072	1	EC_LVID	DX_SIZE:Diet2D
0.385980990882336	1	EC_LVID	DX_SIZE:Diet20
0.965848991121679	1	EC_LVID	DX_SIZE:Diet40
0.804144445915872	1	EC_LVIS	DX_SIZE:Diet1D
0.905774313438719	1	EC_LVIS	DX_SIZE:Diet2D
0.647914277980334	1	EC_LVIS	DX_SIZE:Diet20
0.0959690143634094	1	EC_LVIS	DX_SIZE:Diet40
0.212952468450908	1	EC_LVMA	DX_SIZE:Diet1D
0.452328737118806	1	EC_LVMA	DX_SIZE:Diet2D
0.0668289625759126	1	EC_LVMA	DX_SIZE:Diet20
0.535808361664722	1	EC_LVMA	DX_SIZE:Diet40
0.998564667114044	1	EC_LVPD	DX_SIZE:Diet1D
0.145245531753956	1	EC_LVPD	DX_SIZE:Diet2D
0.194426223831006	1	EC_LVPD	DX_SIZE:Diet20
0.779723013132321	1	EC_LVPD	DX_SIZE:Diet40
0.946351870451564	1	EC_LVPS	DX_SIZE:Diet1D
0.419906074366756	1	EC_LVPS	DX_SIZE:Diet2D
0.159302086603271	1	EC_LVPS	DX_SIZE:Diet20
0.14266317902734	1	EC_LVPS	DX_SIZE:Diet40
0.243651621471823	1	EC_STRO	DX_SIZE:Diet1D
0.198846868466888	1	EC_STRO	DX_SIZE:Diet2D
0.0390840172014744	1	EC_STRO	DX_SIZE:Diet20
0.0118520107720531	1	EC_STRO	DX_SIZE:Diet40
0.400736819252935	1	GS_APAW	DX_SIZE:Diet1D
0.479901520055097	1	GS_APAW	DX_SIZE:Diet2D
0.0873416110543797	1	GS_APAW	DX_SIZE:Diet20
0.802766050198433	1	GS_APAW	DX_SIZE:Diet40
0.00202291948398714	1	GS_FORE	DX_SIZE:Diet1D
0.221320306520156	1	GS_FORE	DX_SIZE:Diet2D
0.0566122959584935	1	GS_FORE	DX_SIZE:Diet20
0.70702740954326	1	GS_FORE	DX_SIZE:Diet40
0.51603319330027	1	RR_FIRS	DX_SIZE:Diet1D
0.493505145983316	1	RR_FIRS	DX_SIZE:Diet2D
0.403394289254831	1	RR_FIRS	DX_SIZE:Diet20
0.546597019812628	1	RR_FIRS	DX_SIZE:Diet40
0.497640603083055	1	RR_SLOP	DX_SIZE:Diet1D
0.72637173957108	1	RR_SLOP	DX_SIZE:Diet2D
0.902752131148845	1	RR_SLOP	DX_SIZE:Diet20
0.983195109940545	1	RR_SLOP	DX_SIZE:Diet40
0.731181260940744	1	RR_TAVG	DX_SIZE:Diet1D
0.797274439123779	1	RR_TAVG	DX_SIZE:Diet2D
0.593503781084497	1	RR_TAVG	DX_SIZE:Diet20
0.961300244864631	1	RR_TAVG	DX_SIZE:Diet40
0.225681063591126	1	WR_DDAY	DX_SIZE:Diet1D
0.391713358502423	1	WR_DDAY	DX_SIZE:Diet2D
0.351037102705191	1	WR_DDAY	DX_SIZE:Diet20
0.863230160387103	1	WR_DDAY	DX_SIZE:Diet40
0.110959596116865	1	WR_DIST	DX_SIZE:Diet1D
0.310622772316039	1	WR_DIST	DX_SIZE:Diet2D
0.789293983586448	1	WR_DIST	DX_SIZE:Diet20
0.834843895556151	1	WR_DIST	DX_SIZE:Diet40
0.118884858313581	1	WR_DNIG	DX_SIZE:Diet1D
0.331046743603011	1	WR_DNIG	DX_SIZE:Diet2D
0.866503830147498	1	WR_DNIG	DX_SIZE:Diet20
0.806698573652806	1	WR_DNIG	DX_SIZE:Diet40
0.135059798464791	1	WR_MDAY	DX_SIZE:Diet1D
0.770313194126594	1	WR_MDAY	DX_SIZE:Diet2D
0.651580156196655	1	WR_MDAY	DX_SIZE:Diet20
0.748824161530487	1	WR_MDAY	DX_SIZE:Diet40
0.149289253404519	1	WR_MNIG	DX_SIZE:Diet1D
0.59955569836091	1	WR_MNIG	DX_SIZE:Diet2D
0.996226146680332	1	WR_MNIG	DX_SIZE:Diet20
0.703529217843074	1	WR_MNIG	DX_SIZE:Diet40
0.225676463785588	1	WR_MSPE	DX_SIZE:Diet1D
0.556306504771848	1	WR_MSPE	DX_SIZE:Diet2D
0.646598827974244	1	WR_MSPE	DX_SIZE:Diet20
0.638414229969622	1	WR_MSPE	DX_SIZE:Diet40
0.504232851289844	1	WR_TDAY	DX_SIZE:Diet1D
0.965228928451053	1	WR_TDAY	DX_SIZE:Diet2D
0.777105945476422	1	WR_TDAY	DX_SIZE:Diet20
0.570319648357417	1	WR_TDAY	DX_SIZE:Diet40
0.207391611441194	1	WR_TNIG	DX_SIZE:Diet1D
0.669045862380769	1	WR_TNIG	DX_SIZE:Diet2D
0.934313604961788	1	WR_TNIG	DX_SIZE:Diet20
0.550410221494598	1	WR_TNIG	DX_SIZE:Diet40
0.775500911610547	1	AS_SLOP	DX_TARE:Diet1D
0.927054692778487	1	AS_SLOP	DX_TARE:Diet2D
0.912320442276087	1	AS_SLOP	DX_TARE:Diet20
0.20593164117878	1	AS_SLOP	DX_TARE:Diet40
0.937584568185449	1	AS_TAUC	DX_TARE:Diet1D
0.716530012313338	1	AS_TAUC	DX_TARE:Diet2D
0.186899041354416	1	AS_TAUC	DX_TARE:Diet20
0.998757400012858	1	AS_TAUC	DX_TARE:Diet40
0.509167735454835	1	AS_XINF	DX_TARE:Diet1D
0.398395193040194	1	AS_XINF	DX_TARE:Diet2D
0.685651673619794	1	AS_XINF	DX_TARE:Diet20
0.965282930895852	1	AS_XINF	DX_TARE:Diet40
0.445321556823402	1	AS_YINF	DX_TARE:Diet1D
0.95881459698094	1	AS_YINF	DX_TARE:Diet2D
0.0758213944823361	1	AS_YINF	DX_TARE:Diet20
0.660693912439762	1	AS_YINF	DX_TARE:Diet40
0.351018445174006	1	DX_BARE	DX_TARE:Diet1D
0.0520794279582571	1	DX_BARE	DX_TARE:Diet2D
0.53045550713218	1	DX_BARE	DX_TARE:Diet20
0.731257048858552	1	DX_BARE	DX_TARE:Diet40
0.816805211791197	1	DX_BODY	DX_TARE:Diet1D
0.947140672644318	1	DX_BODY	DX_TARE:Diet2D
0.927861566251145	1	DX_BODY	DX_TARE:Diet20
0.0524448012118041	1	DX_BODY	DX_TARE:Diet40
0.24495027001102	1	DX_BOMC	DX_TARE:Diet1D
0.0437386644679511	1	DX_BOMC	DX_TARE:Diet2D
0.228358327799488	1	DX_BOMC	DX_TARE:Diet20
0.478043298622621	1	DX_BOMC	DX_TARE:Diet40
0.304526098288389	1	DX_BOMD	DX_TARE:Diet1D
0.22297003831688	1	DX_BOMD	DX_TARE:Diet2D
0.177728140724847	1	DX_BOMD	DX_TARE:Diet20
0.0730939467406014	1	DX_BOMD	DX_TARE:Diet40
0.935609672287624	1	DX_PFAT	DX_TARE:Diet1D
0.76401008457643	1	DX_PFAT	DX_TARE:Diet2D
0.93564905347164	1	DX_PFAT	DX_TARE:Diet20
0.206105147508252	1	DX_PFAT	DX_TARE:Diet40
0.625133051515255	1	DX_SIZE	DX_TARE:Diet1D
0.126314302789873	1	DX_SIZE	DX_TARE:Diet2D
0.5487057311345	1	DX_SIZE	DX_TARE:Diet20
0.758961601819667	1	DX_SIZE	DX_TARE:Diet40
0.967944715723908	1	DX_TTME	DX_TARE:Diet1D
0.459858529259614	1	DX_TTME	DX_TARE:Diet2D
0.784302399474088	1	DX_TTME	DX_TARE:Diet20
0.0280254165161648	1	DX_TTME	DX_TARE:Diet40
0.728060585913164	1	EC_COUT	DX_TARE:Diet1D
0.602940231543939	1	EC_COUT	DX_TARE:Diet2D
0.0360412520398899	1	EC_COUT	DX_TARE:Diet20
0.0738831176099211	1	EC_COUT	DX_TARE:Diet40
0.913624150604791	1	EC_EFRA	DX_TARE:Diet1D
0.481644844805651	1	EC_EFRA	DX_TARE:Diet2D
0.0616438104224956	1	EC_EFRA	DX_TARE:Diet20
0.206838315687709	1	EC_EFRA	DX_TARE:Diet40
0.366359001133743	1	EC_HRAT	DX_TARE:Diet1D
0.621235285789247	1	EC_HRAT	DX_TARE:Diet2D
0.659805739721737	1	EC_HRAT	DX_TARE:Diet20
0.58781266895362	1	EC_HRAT	DX_TARE:Diet40
0.110098418691418	1	EC_IVSD	DX_TARE:Diet1D
0.0970162880170867	1	EC_IVSD	DX_TARE:Diet2D
0.604150918035517	1	EC_IVSD	DX_TARE:Diet20
0.0126184104543848	1	EC_IVSD	DX_TARE:Diet40
0.876439291046095	1	EC_IVSS	DX_TARE:Diet1D
0.43589857713607	1	EC_IVSS	DX_TARE:Diet2D
0.0435647313717218	1	EC_IVSS	DX_TARE:Diet20
0.695264075965421	1	EC_IVSS	DX_TARE:Diet40
0.965246009922455	1	EC_LVID	DX_TARE:Diet1D
0.863610631011786	1	EC_LVID	DX_TARE:Diet2D
0.897760062969899	1	EC_LVID	DX_TARE:Diet20
0.628566949732547	1	EC_LVID	DX_TARE:Diet40
0.90370458527808	1	EC_LVIS	DX_TARE:Diet1D
0.552969817843398	1	EC_LVIS	DX_TARE:Diet2D
0.274235822120772	1	EC_LVIS	DX_TARE:Diet20
0.634518550763169	1	EC_LVIS	DX_TARE:Diet40
0.668648496395726	1	EC_LVMA	DX_TARE:Diet1D
0.520537425461147	1	EC_LVMA	DX_TARE:Diet2D
0.171592249915938	1	EC_LVMA	DX_TARE:Diet20
0.327051186547621	1	EC_LVMA	DX_TARE:Diet40
0.288333785932452	1	EC_LVPD	DX_TARE:Diet1D
0.699875454343687	1	EC_LVPD	DX_TARE:Diet2D
0.0338472659719021	1	EC_LVPD	DX_TARE:Diet20
0.742145306031046	1	EC_LVPD	DX_TARE:Diet40
0.89219322518733	1	EC_LVPS	DX_TARE:Diet1D
0.402353433896045	1	EC_LVPS	DX_TARE:Diet2D
0.130505260584531	1	EC_LVPS	DX_TARE:Diet20
0.968380896574867	1	EC_LVPS	DX_TARE:Diet40
0.835262726454679	1	EC_STRO	DX_TARE:Diet1D
0.828610261527652	1	EC_STRO	DX_TARE:Diet2D
0.0430689615639504	1	EC_STRO	DX_TARE:Diet20
0.077093215285247	1	EC_STRO	DX_TARE:Diet40
0.192652471497407	1	GS_APAW	DX_TARE:Diet1D
0.0307103765997789	1	GS_APAW	DX_TARE:Diet2D
0.184990280615766	1	GS_APAW	DX_TARE:Diet20
0.762248040922315	1	GS_APAW	DX_TARE:Diet40
0.05109774096881	1	GS_FORE	DX_TARE:Diet1D
0.377001896373437	1	GS_FORE	DX_TARE:Diet2D
0.93451156086124	1	GS_FORE	DX_TARE:Diet20
0.967784375174694	1	GS_FORE	DX_TARE:Diet40
0.561008414743441	1	RR_FIRS	DX_TARE:Diet1D
0.460120928175596	1	RR_FIRS	DX_TARE:Diet2D
0.969745267198296	1	RR_FIRS	DX_TARE:Diet20
0.137436255146512	1	RR_FIRS	DX_TARE:Diet40
0.647270656474149	1	RR_SLOP	DX_TARE:Diet1D
0.731471592887978	1	RR_SLOP	DX_TARE:Diet2D
0.831913598887293	1	RR_SLOP	DX_TARE:Diet20
0.396007388264024	1	RR_SLOP	DX_TARE:Diet40
0.409424388632514	1	RR_TAVG	DX_TARE:Diet1D
0.966308330586365	1	RR_TAVG	DX_TARE:Diet2D
0.890930213078997	1	RR_TAVG	DX_TARE:Diet20
0.559545489056299	1	RR_TAVG	DX_TARE:Diet40
0.876172534047163	1	WR_DDAY	DX_TARE:Diet1D
0.869573543980936	1	WR_DDAY	DX_TARE:Diet2D
0.934705596048692	1	WR_DDAY	DX_TARE:Diet20
0.10625833365014	1	WR_DDAY	DX_TARE:Diet40
0.534862823056092	1	WR_DIST	DX_TARE:Diet1D
0.975080222302856	1	WR_DIST	DX_TARE:Diet2D
0.653432279876161	1	WR_DIST	DX_TARE:Diet20
0.21574298029838	1	WR_DIST	DX_TARE:Diet40
0.505901087945311	1	WR_DNIG	DX_TARE:Diet1D
0.939167077941284	1	WR_DNIG	DX_TARE:Diet2D
0.623381100049931	1	WR_DNIG	DX_TARE:Diet20
0.28682026444221	1	WR_DNIG	DX_TARE:Diet40
0.764999221458456	1	WR_MDAY	DX_TARE:Diet1D
0.719276986268184	1	WR_MDAY	DX_TARE:Diet2D
0.868810324530265	1	WR_MDAY	DX_TARE:Diet20
0.365115125864131	1	WR_MDAY	DX_TARE:Diet40
0.22535638890707	1	WR_MNIG	DX_TARE:Diet1D
0.55820242075345	1	WR_MNIG	DX_TARE:Diet2D
0.721688776348332	1	WR_MNIG	DX_TARE:Diet20
0.273476430911415	1	WR_MNIG	DX_TARE:Diet40
0.126055836330782	1	WR_MSPE	DX_TARE:Diet1D
0.999404155127616	1	WR_MSPE	DX_TARE:Diet2D
0.813461487780958	1	WR_MSPE	DX_TARE:Diet20
0.516320935435584	1	WR_MSPE	DX_TARE:Diet40
0.869737043133612	1	WR_TDAY	DX_TARE:Diet1D
0.631166373169558	1	WR_TDAY	DX_TARE:Diet2D
0.386745644793874	1	WR_TDAY	DX_TARE:Diet20
0.132422441774197	1	WR_TDAY	DX_TARE:Diet40
0.808155238859049	1	WR_TNIG	DX_TARE:Diet1D
0.758061121856215	1	WR_TNIG	DX_TARE:Diet2D
0.26537243956723	1	WR_TNIG	DX_TARE:Diet20
0.318254600750731	1	WR_TNIG	DX_TARE:Diet40
0.713602050322848	1	AS_SLOP	DX_TTME:Diet1D
0.650653634217283	1	AS_SLOP	DX_TTME:Diet2D
0.755719131257231	1	AS_SLOP	DX_TTME:Diet20
0.0460296926977611	1	AS_SLOP	DX_TTME:Diet40
0.762005947484074	1	AS_TAUC	DX_TTME:Diet1D
0.625493845152442	1	AS_TAUC	DX_TTME:Diet2D
0.260701960309932	1	AS_TAUC	DX_TTME:Diet20
0.922239718250417	1	AS_TAUC	DX_TTME:Diet40
0.615613668433575	1	AS_XINF	DX_TTME:Diet1D
0.476917798930647	1	AS_XINF	DX_TTME:Diet2D
0.760353614819468	1	AS_XINF	DX_TTME:Diet20
0.947016213262396	1	AS_XINF	DX_TTME:Diet40
0.346255001767827	1	AS_YINF	DX_TTME:Diet1D
0.883783512935006	1	AS_YINF	DX_TTME:Diet2D
0.0830067746899523	1	AS_YINF	DX_TTME:Diet20
0.871421744364312	1	AS_YINF	DX_TTME:Diet40
0.690322555933959	1	DX_BARE	DX_TTME:Diet1D
0.104074692998711	1	DX_BARE	DX_TTME:Diet2D
0.798254620268754	1	DX_BARE	DX_TTME:Diet20
0.705912330000218	1	DX_BARE	DX_TTME:Diet40
0.307308331892319	1	DX_BODY	DX_TTME:Diet1D
0.125416788337808	1	DX_BODY	DX_TTME:Diet2D
0.610804778441279	1	DX_BODY	DX_TTME:Diet20
0.846274958962524	1	DX_BODY	DX_TTME:Diet40
0.360699907207817	1	DX_BOMC	DX_TTME:Diet1D
0.0389057094846208	1	DX_BOMC	DX_TTME:Diet2D
0.395244616663667	1	DX_BOMC	DX_TTME:Diet20
0.539914477698905	1	DX_BOMC	DX_TTME:Diet40
0.198197350667349	1	DX_BOMD	DX_TTME:Diet1D
0.0543973814698827	1	DX_BOMD	DX_TTME:Diet2D
0.222485615159701	1	DX_BOMD	DX_TTME:Diet20
0.0712139363577922	1	DX_BOMD	DX_TTME:Diet40
0.892121099300503	1	DX_PFAT	DX_TTME:Diet1D
0.521232495614622	1	DX_PFAT	DX_TTME:Diet2D
0.640079027225794	1	DX_PFAT	DX_TTME:Diet20
0.0124793834963771	1	DX_PFAT	DX_TTME:Diet40
0.424237685968649	1	DX_SIZE	DX_TTME:Diet1D
0.066986882481477	1	DX_SIZE	DX_TTME:Diet2D
0.826299950467462	1	DX_SIZE	DX_TTME:Diet20
0.668850735872647	1	DX_SIZE	DX_TTME:Diet40
0.0897962619660602	1	DX_TARE	DX_TTME:Diet1D
0.972060338760804	1	DX_TARE	DX_TTME:Diet2D
0.666832240197155	1	DX_TARE	DX_TTME:Diet20
0.072846441379057	1	DX_TARE	DX_TTME:Diet40
0.728089201034548	1	EC_COUT	DX_TTME:Diet1D
0.583629038019658	1	EC_COUT	DX_TTME:Diet2D
0.0108930767224036	1	EC_COUT	DX_TTME:Diet20
0.104932236212507	1	EC_COUT	DX_TTME:Diet40
0.938691049228744	1	EC_EFRA	DX_TTME:Diet1D
0.392583332326907	1	EC_EFRA	DX_TTME:Diet2D
0.0443317614720498	1	EC_EFRA	DX_TTME:Diet20
0.20242409993895	1	EC_EFRA	DX_TTME:Diet40
0.226191595598711	1	EC_HRAT	DX_TTME:Diet1D
0.740813763276085	1	EC_HRAT	DX_TTME:Diet2D
0.847393807340395	1	EC_HRAT	DX_TTME:Diet20
0.980337659303853	1	EC_HRAT	DX_TTME:Diet40
0.0170812453141157	1	EC_IVSD	DX_TTME:Diet1D
0.0935757394040148	1	EC_IVSD	DX_TTME:Diet2D
0.918864125218557	1	EC_IVSD	DX_TTME:Diet20
0.0125861065824024	1	EC_IVSD	DX_TTME:Diet40
0.48412498553239	1	EC_IVSS	DX_TTME:Diet1D
0.560696587859933	1	EC_IVSS	DX_TTME:Diet2D
0.0734006770593265	1	EC_IVSS	DX_TTME:Diet20
0.595724733341549	1	EC_IVSS	DX_TTME:Diet40
0.911003679640448	1	EC_LVID	DX_TTME:Diet1D
0.828821798808824	1	EC_LVID	DX_TTME:Diet2D
0.595490096323657	1	EC_LVID	DX_TTME:Diet20
0.648101994500835	1	EC_LVID	DX_TTME:Diet40
0.891577729511795	1	EC_LVIS	DX_TTME:Diet1D
0.43872401114534	1	EC_LVIS	DX_TTME:Diet2D
0.338064653687772	1	EC_LVIS	DX_TTME:Diet20
0.634239231959613	1	EC_LVIS	DX_TTME:Diet40
0.397967880800204	1	EC_LVMA	DX_TTME:Diet1D
0.592252190734933	1	EC_LVMA	DX_TTME:Diet2D
0.24730686977551	1	EC_LVMA	DX_TTME:Diet20
0.306204669289144	1	EC_LVMA	DX_TTME:Diet40
0.314015685046118	1	EC_LVPD	DX_TTME:Diet1D
0.576616917586701	1	EC_LVPD	DX_TTME:Diet2D
0.0840863587663001	1	EC_LVPD	DX_TTME:Diet20
0.674633509040917	1	EC_LVPD	DX_TTME:Diet40
0.771943838402378	1	EC_LVPS	DX_TTME:Diet1D
0.522032292396475	1	EC_LVPS	DX_TTME:Diet2D
0.173213799849488	1	EC_LVPS	DX_TTME:Diet20
0.893792527857976	1	EC_LVPS	DX_TTME:Diet40
0.705109182809682	1	EC_STRO	DX_TTME:Diet1D
0.784311821201635	1	EC_STRO	DX_TTME:Diet2D
0.00911064521950715	1	EC_STRO	DX_TTME:Diet20
0.0683935847684899	1	EC_STRO	DX_TTME:Diet40
0.0620728486434886	1	GS_APAW	DX_TTME:Diet1D
0.0115647712805171	1	GS_APAW	DX_TTME:Diet2D
0.117360239566147	1	GS_APAW	DX_TTME:Diet20
0.484100768505336	1	GS_APAW	DX_TTME:Diet40
0.0393758402778915	1	GS_FORE	DX_TTME:Diet1D
0.459566647988327	1	GS_FORE	DX_TTME:Diet2D
0.852293013343059	1	GS_FORE	DX_TTME:Diet20
0.961398172951343	1	GS_FORE	DX_TTME:Diet40
0.771900671419773	1	RR_FIRS	DX_TTME:Diet1D
0.507138497397632	1	RR_FIRS	DX_TTME:Diet2D
0.868300598814434	1	RR_FIRS	DX_TTME:Diet20
0.0937061409898556	1	RR_FIRS	DX_TTME:Diet40
0.763271939195135	1	RR_SLOP	DX_TTME:Diet1D
0.767355159530542	1	RR_SLOP	DX_TTME:Diet2D
0.817202747645806	1	RR_SLOP	DX_TTME:Diet20
0.142405791240752	1	RR_SLOP	DX_TTME:Diet40
0.595443729499375	1	RR_TAVG	DX_TTME:Diet1D
0.839989783477737	1	RR_TAVG	DX_TTME:Diet2D
0.888762600391704	1	RR_TAVG	DX_TTME:Diet20
0.812187251971108	1	RR_TAVG	DX_TTME:Diet40
0.846449409074561	1	WR_DDAY	DX_TTME:Diet1D
0.605651866159772	1	WR_DDAY	DX_TTME:Diet2D
0.897955566731343	1	WR_DDAY	DX_TTME:Diet20
0.043369843399576	1	WR_DDAY	DX_TTME:Diet40
0.865500694631498	1	WR_DIST	DX_TTME:Diet1D
0.685034873836547	1	WR_DIST	DX_TTME:Diet2D
0.943170511332256	1	WR_DIST	DX_TTME:Diet20
0.146724338844045	1	WR_DIST	DX_TTME:Diet40
0.891248270058765	1	WR_DNIG	DX_TTME:Diet1D
0.748431795585617	1	WR_DNIG	DX_TTME:Diet2D
0.902032217958556	1	WR_DNIG	DX_TTME:Diet20
0.214348713594903	1	WR_DNIG	DX_TTME:Diet40
0.510740852432793	1	WR_MDAY	DX_TTME:Diet1D
0.950595744096825	1	WR_MDAY	DX_TTME:Diet2D
0.76233331374469	1	WR_MDAY	DX_TTME:Diet20
0.318362801452526	1	WR_MDAY	DX_TTME:Diet40
0.759454515014415	1	WR_MNIG	DX_TTME:Diet1D
0.877196492398804	1	WR_MNIG	DX_TTME:Diet2D
0.970023803547604	1	WR_MNIG	DX_TTME:Diet20
0.268565967497351	1	WR_MNIG	DX_TTME:Diet40
0.330847814052027	1	WR_MSPE	DX_TTME:Diet1D
0.590812055639285	1	WR_MSPE	DX_TTME:Diet2D
0.667805157778941	1	WR_MSPE	DX_TTME:Diet20
0.553009519949366	1	WR_MSPE	DX_TTME:Diet40
0.946092305557836	1	WR_TDAY	DX_TTME:Diet1D
0.809486005984986	1	WR_TDAY	DX_TTME:Diet2D
0.351412581925861	1	WR_TDAY	DX_TTME:Diet20
0.089372113539607	1	WR_TDAY	DX_TTME:Diet40
0.580161014499992	1	WR_TNIG	DX_TTME:Diet1D
0.983111237550508	1	WR_TNIG	DX_TTME:Diet2D
0.549993592671144	1	WR_TNIG	DX_TTME:Diet20
0.271608425783838	1	WR_TNIG	DX_TTME:Diet40
0.716394017773532	1	AS_SLOP	EC_COUT:Diet1D
0.351987275610264	1	AS_SLOP	EC_COUT:Diet2D
0.769787411026606	1	AS_SLOP	EC_COUT:Diet20
0.956123581313422	1	AS_SLOP	EC_COUT:Diet40
0.0442963504300521	1	AS_TAUC	EC_COUT:Diet1D
0.279491168500194	1	AS_TAUC	EC_COUT:Diet2D
0.44610269832825	1	AS_TAUC	EC_COUT:Diet20
0.140166297868857	1	AS_TAUC	EC_COUT:Diet40
0.48320142808238	1	AS_XINF	EC_COUT:Diet1D
0.223064883339389	1	AS_XINF	EC_COUT:Diet2D
0.572611056454216	1	AS_XINF	EC_COUT:Diet20
0.504886715463007	1	AS_XINF	EC_COUT:Diet40
0.0726206430179066	1	AS_YINF	EC_COUT:Diet1D
0.854408648546184	1	AS_YINF	EC_COUT:Diet2D
0.580281034033486	1	AS_YINF	EC_COUT:Diet20
0.32279221301618	1	AS_YINF	EC_COUT:Diet40
0.696281024856168	1	DX_BARE	EC_COUT:Diet1D
0.49863292183246	1	DX_BARE	EC_COUT:Diet2D
0.893165278524239	1	DX_BARE	EC_COUT:Diet20
0.494526298467859	1	DX_BARE	EC_COUT:Diet40
0.0800284961758592	1	DX_BODY	EC_COUT:Diet1D
0.152480112323388	1	DX_BODY	EC_COUT:Diet2D
0.000282516146685213	0.355970344823368	DX_BODY	EC_COUT:Diet20
0.00257166325247931	1	DX_BODY	EC_COUT:Diet40
0.946130461936226	1	DX_BOMC	EC_COUT:Diet1D
0.735819475444023	1	DX_BOMC	EC_COUT:Diet2D
0.69097086295574	1	DX_BOMC	EC_COUT:Diet20
0.518066004514698	1	DX_BOMC	EC_COUT:Diet40
0.524732381564559	1	DX_BOMD	EC_COUT:Diet1D
0.998096556569156	1	DX_BOMD	EC_COUT:Diet2D
0.647865286953662	1	DX_BOMD	EC_COUT:Diet20
0.731620555536797	1	DX_BOMD	EC_COUT:Diet40
0.873622071707599	1	DX_PFAT	EC_COUT:Diet1D
0.716258904029297	1	DX_PFAT	EC_COUT:Diet2D
0.28565001069022	1	DX_PFAT	EC_COUT:Diet20
0.315593465619928	1	DX_PFAT	EC_COUT:Diet40
0.116528591682928	1	DX_SIZE	EC_COUT:Diet1D
0.19565842431578	1	DX_SIZE	EC_COUT:Diet2D
0.018872455537277	1	DX_SIZE	EC_COUT:Diet20
0.00341874449210943	1	DX_SIZE	EC_COUT:Diet40
0.12357058438912	1	DX_TARE	EC_COUT:Diet1D
0.230176863664211	1	DX_TARE	EC_COUT:Diet2D
0.00330681691655557	1	DX_TARE	EC_COUT:Diet20
0.00719992041316708	1	DX_TARE	EC_COUT:Diet40
0.0939502813388878	1	DX_TTME	EC_COUT:Diet1D
0.129532913339786	1	DX_TTME	EC_COUT:Diet2D
0.000447397482652445	0.563720828142081	DX_TTME	EC_COUT:Diet20
0.0032584968475068	1	DX_TTME	EC_COUT:Diet40
0.731879349280887	1	EC_EFRA	EC_COUT:Diet1D
0.498157623612984	1	EC_EFRA	EC_COUT:Diet2D
0.246008003887118	1	EC_EFRA	EC_COUT:Diet20
0.874824632074694	1	EC_EFRA	EC_COUT:Diet40
0.198803636996013	1	EC_HRAT	EC_COUT:Diet1D
0.451816840938165	1	EC_HRAT	EC_COUT:Diet2D
0.874859069752787	1	EC_HRAT	EC_COUT:Diet20
0.796438230329172	1	EC_HRAT	EC_COUT:Diet40
0.0799210792184247	1	EC_IVSD	EC_COUT:Diet1D
0.129276057119959	1	EC_IVSD	EC_COUT:Diet2D
0.576184139265705	1	EC_IVSD	EC_COUT:Diet20
0.768809140531304	1	EC_IVSD	EC_COUT:Diet40
0.156394924284456	1	EC_IVSS	EC_COUT:Diet1D
0.23800635391172	1	EC_IVSS	EC_COUT:Diet2D
0.949881318785383	1	EC_IVSS	EC_COUT:Diet20
0.805068249842213	1	EC_IVSS	EC_COUT:Diet40
0.199319862035033	1	EC_LVID	EC_COUT:Diet1D
0.177560028716504	1	EC_LVID	EC_COUT:Diet2D
0.584521394047844	1	EC_LVID	EC_COUT:Diet20
0.630687537951322	1	EC_LVID	EC_COUT:Diet40
0.385805468813902	1	EC_LVIS	EC_COUT:Diet1D
0.218036352579783	1	EC_LVIS	EC_COUT:Diet2D
0.489795094187249	1	EC_LVIS	EC_COUT:Diet20
0.8683482192468	1	EC_LVIS	EC_COUT:Diet40
0.943019852814072	1	EC_LVMA	EC_COUT:Diet1D
0.702902423771691	1	EC_LVMA	EC_COUT:Diet2D
0.997364793211968	1	EC_LVMA	EC_COUT:Diet20
0.414016805021524	1	EC_LVMA	EC_COUT:Diet40
0.893071528841201	1	EC_LVPD	EC_COUT:Diet1D
0.681673570528995	1	EC_LVPD	EC_COUT:Diet2D
0.549210308776059	1	EC_LVPD	EC_COUT:Diet20
0.338075447485413	1	EC_LVPD	EC_COUT:Diet40
0.826267665858213	1	EC_LVPS	EC_COUT:Diet1D
0.389357708615268	1	EC_LVPS	EC_COUT:Diet2D
0.425697875836595	1	EC_LVPS	EC_COUT:Diet20
0.801419055589262	1	EC_LVPS	EC_COUT:Diet40
0.0311321002930291	1	EC_STRO	EC_COUT:Diet1D
0.0751667626965219	1	EC_STRO	EC_COUT:Diet2D
0.559506984211575	1	EC_STRO	EC_COUT:Diet20
0.675876343918329	1	EC_STRO	EC_COUT:Diet40
0.515850497714009	1	GS_APAW	EC_COUT:Diet1D
0.95046185939311	1	GS_APAW	EC_COUT:Diet2D
0.443698957660505	1	GS_APAW	EC_COUT:Diet20
0.304866544488945	1	GS_APAW	EC_COUT:Diet40
0.410598064029802	1	GS_FORE	EC_COUT:Diet1D
0.740761597977347	1	GS_FORE	EC_COUT:Diet2D
0.0162346318898707	1	GS_FORE	EC_COUT:Diet20
0.310862760059711	1	GS_FORE	EC_COUT:Diet40
0.953034522063383	1	RR_FIRS	EC_COUT:Diet1D
0.542481613412189	1	RR_FIRS	EC_COUT:Diet2D
0.754931644058437	1	RR_FIRS	EC_COUT:Diet20
0.977448368025356	1	RR_FIRS	EC_COUT:Diet40
0.108631800164312	1	RR_SLOP	EC_COUT:Diet1D
0.349091739658698	1	RR_SLOP	EC_COUT:Diet2D
0.0330064280242945	1	RR_SLOP	EC_COUT:Diet20
0.029841842444693	1	RR_SLOP	EC_COUT:Diet40
0.157959939304049	1	RR_TAVG	EC_COUT:Diet1D
0.0946458924721069	1	RR_TAVG	EC_COUT:Diet2D
0.0944772746961093	1	RR_TAVG	EC_COUT:Diet20
0.0254274224288782	1	RR_TAVG	EC_COUT:Diet40
0.46997236100407	1	WR_DDAY	EC_COUT:Diet1D
0.708899295737513	1	WR_DDAY	EC_COUT:Diet2D
0.123235086275403	1	WR_DDAY	EC_COUT:Diet20
0.569824717254762	1	WR_DDAY	EC_COUT:Diet40
0.463448103510996	1	WR_DIST	EC_COUT:Diet1D
0.746586842625286	1	WR_DIST	EC_COUT:Diet2D
0.300441494813343	1	WR_DIST	EC_COUT:Diet20
0.101686810282665	1	WR_DIST	EC_COUT:Diet40
0.476854996997962	1	WR_DNIG	EC_COUT:Diet1D
0.751567300309635	1	WR_DNIG	EC_COUT:Diet2D
0.375093625352944	1	WR_DNIG	EC_COUT:Diet20
0.0752464673988066	1	WR_DNIG	EC_COUT:Diet40
0.420678163155372	1	WR_MDAY	EC_COUT:Diet1D
0.792012127962634	1	WR_MDAY	EC_COUT:Diet2D
0.111067105748999	1	WR_MDAY	EC_COUT:Diet20
0.262883264631115	1	WR_MDAY	EC_COUT:Diet40
0.280712083418448	1	WR_MNIG	EC_COUT:Diet1D
0.363118796957935	1	WR_MNIG	EC_COUT:Diet2D
0.155813611778298	1	WR_MNIG	EC_COUT:Diet20
0.013430484800722	1	WR_MNIG	EC_COUT:Diet40
0.330215240063494	1	WR_MSPE	EC_COUT:Diet1D
0.169130762211772	1	WR_MSPE	EC_COUT:Diet2D
0.085165312622997	1	WR_MSPE	EC_COUT:Diet20
0.0363397914346591	1	WR_MSPE	EC_COUT:Diet40
0.902955547712615	1	WR_TDAY	EC_COUT:Diet1D
0.595405196878539	1	WR_TDAY	EC_COUT:Diet2D
0.988793331592414	1	WR_TDAY	EC_COUT:Diet20
0.187732541266196	1	WR_TDAY	EC_COUT:Diet40
0.601339817158322	1	WR_TNIG	EC_COUT:Diet1D
0.64351755340164	1	WR_TNIG	EC_COUT:Diet2D
0.703044470184794	1	WR_TNIG	EC_COUT:Diet20
0.446024487005774	1	WR_TNIG	EC_COUT:Diet40
0.0759461409883092	1	AS_SLOP	EC_EFRA:Diet1D
0.00258394113782061	1	AS_SLOP	EC_EFRA:Diet2D
0.911940792423208	1	AS_SLOP	EC_EFRA:Diet20
0.0534333564674286	1	AS_SLOP	EC_EFRA:Diet40
0.693179020303153	1	AS_TAUC	EC_EFRA:Diet1D
0.977911826530921	1	AS_TAUC	EC_EFRA:Diet2D
0.635160950353953	1	AS_TAUC	EC_EFRA:Diet20
0.898392198195869	1	AS_TAUC	EC_EFRA:Diet40
0.523207637257624	1	AS_XINF	EC_EFRA:Diet1D
0.469170396407358	1	AS_XINF	EC_EFRA:Diet2D
0.969216088121225	1	AS_XINF	EC_EFRA:Diet20
0.733584362796941	1	AS_XINF	EC_EFRA:Diet40
0.707030693104914	1	AS_YINF	EC_EFRA:Diet1D
0.639629681874994	1	AS_YINF	EC_EFRA:Diet2D
0.717047171362592	1	AS_YINF	EC_EFRA:Diet20
0.860060686698027	1	AS_YINF	EC_EFRA:Diet40
0.676958177650699	1	DX_BARE	EC_EFRA:Diet1D
0.190697195692546	1	DX_BARE	EC_EFRA:Diet2D
0.870695719948644	1	DX_BARE	EC_EFRA:Diet20
0.686473225538339	1	DX_BARE	EC_EFRA:Diet40
0.670322608335193	1	DX_BODY	EC_EFRA:Diet1D
0.626138973179395	1	DX_BODY	EC_EFRA:Diet2D
0.0238354528302913	1	DX_BODY	EC_EFRA:Diet20
0.121913043906743	1	DX_BODY	EC_EFRA:Diet40
0.402395941651775	1	DX_BOMC	EC_EFRA:Diet1D
0.497610978372173	1	DX_BOMC	EC_EFRA:Diet2D
0.191553684456868	1	DX_BOMC	EC_EFRA:Diet20
0.587282539449298	1	DX_BOMC	EC_EFRA:Diet40
0.330788080372064	1	DX_BOMD	EC_EFRA:Diet1D
0.515678927317847	1	DX_BOMD	EC_EFRA:Diet2D
0.0224385982569544	1	DX_BOMD	EC_EFRA:Diet20
0.338676119488907	1	DX_BOMD	EC_EFRA:Diet40
0.354814196276843	1	DX_PFAT	EC_EFRA:Diet1D
0.216442968645686	1	DX_PFAT	EC_EFRA:Diet2D
0.399047539226514	1	DX_PFAT	EC_EFRA:Diet20
0.549169986500941	1	DX_PFAT	EC_EFRA:Diet40
0.565958007258635	1	DX_SIZE	EC_EFRA:Diet1D
0.817892088034146	1	DX_SIZE	EC_EFRA:Diet2D
0.1780388451048	1	DX_SIZE	EC_EFRA:Diet20
0.0132603578470016	1	DX_SIZE	EC_EFRA:Diet40
0.922510112014744	1	DX_TARE	EC_EFRA:Diet1D
0.643084251114787	1	DX_TARE	EC_EFRA:Diet2D
0.0487096105600726	1	DX_TARE	EC_EFRA:Diet20
0.195153207793667	1	DX_TARE	EC_EFRA:Diet40
0.877730415718075	1	DX_TTME	EC_EFRA:Diet1D
0.622345980038344	1	DX_TTME	EC_EFRA:Diet2D
0.0296199068949332	1	DX_TTME	EC_EFRA:Diet20
0.176512561397657	1	DX_TTME	EC_EFRA:Diet40
0.0551382064133241	1	EC_COUT	EC_EFRA:Diet1D
0.0379770950653869	1	EC_COUT	EC_EFRA:Diet2D
0.0458836627264189	1	EC_COUT	EC_EFRA:Diet20
0.772223413966533	1	EC_COUT	EC_EFRA:Diet40
0.137413280641102	1	EC_HRAT	EC_EFRA:Diet1D
0.116022267397886	1	EC_HRAT	EC_EFRA:Diet2D
0.698248127229779	1	EC_HRAT	EC_EFRA:Diet20
0.964934564720656	1	EC_HRAT	EC_EFRA:Diet40
0.262774851964229	1	EC_IVSD	EC_EFRA:Diet1D
0.914075147424524	1	EC_IVSD	EC_EFRA:Diet2D
0.324962164322148	1	EC_IVSD	EC_EFRA:Diet20
0.580889425563727	1	EC_IVSD	EC_EFRA:Diet40
0.427163445071513	1	EC_IVSS	EC_EFRA:Diet1D
0.851084347353426	1	EC_IVSS	EC_EFRA:Diet2D
0.0445734877459031	1	EC_IVSS	EC_EFRA:Diet20
0.736689573570897	1	EC_IVSS	EC_EFRA:Diet40
0.156142838978991	1	EC_LVID	EC_EFRA:Diet1D
0.213427034951955	1	EC_LVID	EC_EFRA:Diet2D
0.129897225591904	1	EC_LVID	EC_EFRA:Diet20
0.273286324610483	1	EC_LVID	EC_EFRA:Diet40
0.264760517967883	1	EC_LVIS	EC_EFRA:Diet1D
0.479418074316453	1	EC_LVIS	EC_EFRA:Diet2D
0.123287878388519	1	EC_LVIS	EC_EFRA:Diet20
0.3960433145609	1	EC_LVIS	EC_EFRA:Diet40
0.060789329377379	1	EC_LVMA	EC_EFRA:Diet1D
0.848255622503252	1	EC_LVMA	EC_EFRA:Diet2D
0.562921255635108	1	EC_LVMA	EC_EFRA:Diet20
0.977621701652749	1	EC_LVMA	EC_EFRA:Diet40
0.553559177438309	1	EC_LVPD	EC_EFRA:Diet1D
0.125889317594766	1	EC_LVPD	EC_EFRA:Diet2D
0.988595209511789	1	EC_LVPD	EC_EFRA:Diet20
0.276325921353715	1	EC_LVPD	EC_EFRA:Diet40
0.102473061753402	1	EC_LVPS	EC_EFRA:Diet1D
0.328830072273329	1	EC_LVPS	EC_EFRA:Diet2D
0.999743587991349	1	EC_LVPS	EC_EFRA:Diet20
0.444871864469393	1	EC_LVPS	EC_EFRA:Diet40
0.237420916917974	1	EC_STRO	EC_EFRA:Diet1D
0.196902727028552	1	EC_STRO	EC_EFRA:Diet2D
0.0391239302113716	1	EC_STRO	EC_EFRA:Diet20
0.675832305937774	1	EC_STRO	EC_EFRA:Diet40
0.496479790025285	1	GS_APAW	EC_EFRA:Diet1D
0.945959802833814	1	GS_APAW	EC_EFRA:Diet2D
0.590079076494118	1	GS_APAW	EC_EFRA:Diet20
0.173515178948212	1	GS_APAW	EC_EFRA:Diet40
0.634445466139139	1	GS_FORE	EC_EFRA:Diet1D
0.709400197693564	1	GS_FORE	EC_EFRA:Diet2D
0.0143613309735408	1	GS_FORE	EC_EFRA:Diet20
0.922535322366691	1	GS_FORE	EC_EFRA:Diet40
0.538323532126206	1	RR_FIRS	EC_EFRA:Diet1D
0.415139270063852	1	RR_FIRS	EC_EFRA:Diet2D
0.842892235251024	1	RR_FIRS	EC_EFRA:Diet20
0.470841817271717	1	RR_FIRS	EC_EFRA:Diet40
0.425366712733837	1	RR_SLOP	EC_EFRA:Diet1D
0.469795084727362	1	RR_SLOP	EC_EFRA:Diet2D
0.0431222852460608	1	RR_SLOP	EC_EFRA:Diet20
0.33754593327136	1	RR_SLOP	EC_EFRA:Diet40
0.748841976192297	1	RR_TAVG	EC_EFRA:Diet1D
0.832383719271739	1	RR_TAVG	EC_EFRA:Diet2D
0.141439582484503	1	RR_TAVG	EC_EFRA:Diet20
0.506770856110147	1	RR_TAVG	EC_EFRA:Diet40
0.785038873427895	1	WR_DDAY	EC_EFRA:Diet1D
0.526631603117692	1	WR_DDAY	EC_EFRA:Diet2D
0.778956824726028	1	WR_DDAY	EC_EFRA:Diet20
0.206730882225639	1	WR_DDAY	EC_EFRA:Diet40
0.438035402770922	1	WR_DIST	EC_EFRA:Diet1D
0.498699415649155	1	WR_DIST	EC_EFRA:Diet2D
0.103797546669	1	WR_DIST	EC_EFRA:Diet20
0.623935914838401	1	WR_DIST	EC_EFRA:Diet40
0.396219462777248	1	WR_DNIG	EC_EFRA:Diet1D
0.404368037981626	1	WR_DNIG	EC_EFRA:Diet2D
0.0888218868626592	1	WR_DNIG	EC_EFRA:Diet20
0.503198257330695	1	WR_DNIG	EC_EFRA:Diet40
0.824197307956184	1	WR_MDAY	EC_EFRA:Diet1D
0.64578268153702	1	WR_MDAY	EC_EFRA:Diet2D
0.296856224698735	1	WR_MDAY	EC_EFRA:Diet20
0.292090832299236	1	WR_MDAY	EC_EFRA:Diet40
0.614609400695375	1	WR_MNIG	EC_EFRA:Diet1D
0.745031197594169	1	WR_MNIG	EC_EFRA:Diet2D
0.235326163194411	1	WR_MNIG	EC_EFRA:Diet20
0.423808546918983	1	WR_MNIG	EC_EFRA:Diet40
0.695536333906354	1	WR_MSPE	EC_EFRA:Diet1D
0.62037303263504	1	WR_MSPE	EC_EFRA:Diet2D
0.267376442404556	1	WR_MSPE	EC_EFRA:Diet20
0.60242290936628	1	WR_MSPE	EC_EFRA:Diet40
0.929813583184067	1	WR_TDAY	EC_EFRA:Diet1D
0.576176973383492	1	WR_TDAY	EC_EFRA:Diet2D
0.95211968530507	1	WR_TDAY	EC_EFRA:Diet20
0.320341444370989	1	WR_TDAY	EC_EFRA:Diet40
0.186323947880045	1	WR_TNIG	EC_EFRA:Diet1D
0.531479538516236	1	WR_TNIG	EC_EFRA:Diet2D
0.0946262704286878	1	WR_TNIG	EC_EFRA:Diet20
0.730858210313328	1	WR_TNIG	EC_EFRA:Diet40
0.413565195953657	1	AS_SLOP	EC_HRAT:Diet1D
0.698317034011013	1	AS_SLOP	EC_HRAT:Diet2D
0.365297613061105	1	AS_SLOP	EC_HRAT:Diet20
0.827209586943858	1	AS_SLOP	EC_HRAT:Diet40
0.690138097432945	1	AS_TAUC	EC_HRAT:Diet1D
0.444113078994232	1	AS_TAUC	EC_HRAT:Diet2D
0.321219212767615	1	AS_TAUC	EC_HRAT:Diet20
0.829018724565143	1	AS_TAUC	EC_HRAT:Diet40
0.535363954275807	1	AS_XINF	EC_HRAT:Diet1D
0.816590859014987	1	AS_XINF	EC_HRAT:Diet2D
0.539950875008489	1	AS_XINF	EC_HRAT:Diet20
0.00865340020309219	1	AS_XINF	EC_HRAT:Diet40
0.382167322530163	1	AS_YINF	EC_HRAT:Diet1D
0.481837157309624	1	AS_YINF	EC_HRAT:Diet2D
0.671223904548993	1	AS_YINF	EC_HRAT:Diet20
0.136444923401056	1	AS_YINF	EC_HRAT:Diet40
0.432538426606778	1	DX_BARE	EC_HRAT:Diet1D
0.760008730207417	1	DX_BARE	EC_HRAT:Diet2D
0.985197574177127	1	DX_BARE	EC_HRAT:Diet20
0.0557163448230413	1	DX_BARE	EC_HRAT:Diet40
0.894489648220016	1	DX_BODY	EC_HRAT:Diet1D
0.829428328015554	1	DX_BODY	EC_HRAT:Diet2D
0.597890526076914	1	DX_BODY	EC_HRAT:Diet20
0.298427863397874	1	DX_BODY	EC_HRAT:Diet40
0.65918470564755	1	DX_BOMC	EC_HRAT:Diet1D
0.650007696565035	1	DX_BOMC	EC_HRAT:Diet2D
0.757911374583118	1	DX_BOMC	EC_HRAT:Diet20
0.151193597269357	1	DX_BOMC	EC_HRAT:Diet40
0.707140934922174	1	DX_BOMD	EC_HRAT:Diet1D
0.673613471537806	1	DX_BOMD	EC_HRAT:Diet2D
0.765844922699826	1	DX_BOMD	EC_HRAT:Diet20
0.756803752828918	1	DX_BOMD	EC_HRAT:Diet40
0.859849165799509	1	DX_PFAT	EC_HRAT:Diet1D
0.734407116659253	1	DX_PFAT	EC_HRAT:Diet2D
0.639940603948434	1	DX_PFAT	EC_HRAT:Diet20
0.936926780839106	1	DX_PFAT	EC_HRAT:Diet40
0.820192087031912	1	DX_SIZE	EC_HRAT:Diet1D
0.686669748616027	1	DX_SIZE	EC_HRAT:Diet2D
0.659427421347578	1	DX_SIZE	EC_HRAT:Diet20
[truncated: 3,041 more rows]
